# Supplementary material for: Visible-light-triggered direct keto-difluoroacetylation of styrenes with (fluorosulfonyl)difluoroacetate and dimethyl sulfoxide leads to α-difluoroacetylated ketones
Source: Royal Society of Chemistry journal article supplement (doi:10.1039/c9cc06037e), 2019-01-01
Supplement: c9cc06037e1.pdf [file c9cc06037e1.pdf]

Visible-light-triggered direct keto-difluoroacetylation of styrenes with (florosulfonyl)difluoroacetate and DMSO lead to  $\alpha$ -difluoroacetated ketones

Xuewei Luo,<sup>a</sup> Zhengning Fan,<sup>a</sup> Bo Zhang,<sup>a</sup> Chao Chen<sup>\*a</sup> and Chanjuan Xi<sup>\*ab</sup>

<sup>a</sup>MOE Key Laboratory of Bioorganic Phosphorus Chemistry & Chemical Biology, Department of Chemistry, Tsinghua University, Beijing 100084, China

<sup>b</sup>State Key Laboratory of Elemento-Organic Chemistry, Nankai University, Tianjin 300071, China

E-mail: chenchao01@mails.tsinghua.edu.cn; cjxi@tsinghua.edu.cn

**List of the contents:**

|                                                                                        |     |
|----------------------------------------------------------------------------------------|-----|
| 1. General Comments.....                                                               | S2  |
| 2. Experimental Section.....                                                           | S3  |
| 3. References.....                                                                     | S14 |
| 3. Copies of <sup>1</sup> H, <sup>13</sup> C NMR, and <sup>19</sup> F NMR Spectra..... | S15 |

## 1. General Comments

All the reactions were carried out in oven-dried sealed tube with Teflon-lined septum under N<sub>2</sub> atmosphere. Unless indicated, all materials were obtained from commercial sources and used as received. Superdry dimethyl sulfoxide with molecular sieves in it was use in the reaction. <sup>1</sup>H NMR and <sup>13</sup>C NMR spectra were recorded on 400 MHz at ambient temperature with CDCl<sub>3</sub> as the solvent. <sup>19</sup>F NMR spectra were recorded on 600 MHz at ambient temperature with CDCl<sub>3</sub> as the solvent. Chemical shifts (δ) were given in ppm, referenced to the residual proton resonance of CDCl<sub>3</sub> (7.26), to the carbon resonance of CDCl<sub>3</sub> (77.16). Coupling constants (*J*) were given in Hertz (Hz). The term m, q, t, d, s referred to multiplet, quartet, triplet, doublet, singlet. The reaction progress was monitored by GC-MS if applicable. Column chromatography was performed with silica gel (200-300 meshes). Thin layer chromatography (TLC) was visualized using UV light.

1-Methyl-4-vinylbenzene **1b**,<sup>1</sup> 1-methyl-2-vinylbenzene **1h**,<sup>1</sup> 1-methoxy-2-vinylbenzene **1i**,<sup>1</sup> 1,2-dimethyl-4-vinylbenzene **1j**,<sup>1</sup> 2-vinylnaphthalene **1l**,<sup>1</sup> 1,2-di-p-tolylene **1n**,<sup>2</sup> 1,2-bis(4-fluorophenyl)ethene **1o**,<sup>2</sup> 1-methoxy-4-(prop-1-en-1-yl)benzene **1q**,<sup>3</sup> 1-fluoro-4-(prop-1-en-1-yl)benzene **1r**,<sup>3</sup> pent-1-en-1-ylbenzene **1s**<sup>4</sup> and (1-cyclohexylvinyl)benzene **1y**<sup>5</sup> were synthesized according to literature procedures

## 2. Experimental Section

### General procedure for the keto-difluoromethylation of alkenes

An oven-dried Schleck tube equipped with a stirrer bar was charged with 4.58 mg *fac*-Ir(ppy)<sub>3</sub> (3.5 mol%), which was degassed and refilled with N<sub>2</sub> for 3 times. The alkenes **1a-1x** (0.2 mmol, 1.0 equiv.), Chen reagent FSO<sub>2</sub>CF<sub>2</sub>COOMe (134.4 mg, 0.7 mmol, 3.5 equiv.) and dry DMSO (4 mL) were added under N<sub>2</sub>. The resulting mixture was irradiated for 6 h under room temperature by 3 W blue LEDs. Quenching the reaction with sat. aq. NaHCO<sub>3</sub> and dichloromethane (DCM) was added. The aqueous layer was extracted with DCM twice. The combined organic layer dried by Na<sub>2</sub>SO<sub>4</sub>, and concentrated in *vacuo* and the residue was purified by chromatography on silica gel to give product **3a-3x**, which were identified by <sup>1</sup>H, <sup>13</sup>C, and <sup>19</sup>F NMR.

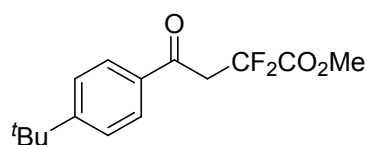

**Methyl 4-(4-(*tert*-butyl)phenyl)-2,2-difluoro-4-oxobutanoate (3a)**<sup>6</sup>: white solid, 44.9 mg (79% yield); mp: 66.7-68.1 °C; <sup>1</sup>H NMR (400 MHz, CHLOROFORM-D) δ 7.89 – 7.83 (m, 2H), 7.53 – 7.49 (m, 2H), 3.95 – 3.87 (m, 5H), 1.34 (s, 9H); <sup>13</sup>C NMR (101 MHz, CHLOROFORM-D) δ 192.7 (t, *J* = 5.8 Hz), 164.0 (t, *J* = 31.4 Hz), 158.4, 133.1, 128.3, 126.0, 114.6 (t, *J* = 249.9 Hz), 53.7, 43.9 (t, *J* = 24.5 Hz), 35.4, 31.1; <sup>19</sup>F NMR (565 MHz, CHLOROFORM-D) δ -104.18 (t, *J* = 13.1 Hz). GC-MS *m/z* [M]<sup>+</sup> 284.

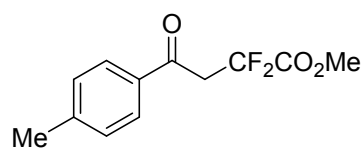

**Methyl 2,2-difluoro-4-oxo-4-(*p*-tolyl)butanoate (3b)**<sup>6</sup>: white solid, 36.3 mg (75% yield); <sup>1</sup>H NMR (400 MHz, CHLOROFORM-D) δ 7.81 (d, *J* = 8.2 Hz, 2H), 7.29 (d, *J* = 8.1 Hz, 2H), 3.94 – 3.85 (m, 5H), 2.43 (s, 3H); <sup>13</sup>C NMR (101 MHz, CHLOROFORM-D) δ 192.7 (t, *J* = 5.9 Hz), 164.0 (t, *J* = 31.6 Hz), 145.5, 133.2, 129.7, 128.4, 114.6 (t, *J* = 249.9 Hz), 53.7, 43.9 (t, *J* = 24.5 Hz), 21.9; <sup>19</sup>F NMR (565 MHz, CHLOROFORM-D) δ -104.30 (t, *J* = 13.4 Hz). GC-MS *m/z* [M]<sup>+</sup> 242.

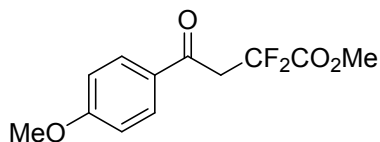

**Methyl 2,2-difluoro-4-(4-methoxyphenyl)-4-oxobutanoate (3c)**<sup>7</sup>: colorless oil liquid, 10.3 mg (20% yield); <sup>1</sup>H NMR (400 MHz, CHLOROFORM-D)  $\delta$  7.89 (d,  $J$  = 9.0 Hz, 2H), 6.96 (d,  $J$  = 8.9 Hz, 2H), 3.93 – 3.82 (m, 8H); <sup>13</sup>C NMR (101 MHz, CHLOROFORM-D)  $\delta$  191.5 (t,  $J$  = 5.9 Hz), 164.4 (t,  $J$  = 36.6 Hz), 131.4, 130.7, 128.8, 114.2, (t,  $J$  = 39.7 Hz), 114.2, 55.7, 53.7, 43.7 (t,  $J$  = 24.4 Hz); <sup>19</sup>F NMR (565 MHz, CHLOROFORM-D)  $\delta$  -104.46 (t,  $J$  = 13.4 Hz). GC-MS  $m/z$  [M]<sup>+</sup> 258.

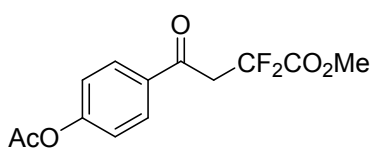

**Methyl 4-(4-acetoxyphenyl)-2,2-difluoro-4-oxobutanoate (3d)**<sup>6</sup>: white solid, 42.3 mg (74% yield); <sup>1</sup>H NMR (400 MHz, CHLOROFORM-D)  $\delta$  7.95 (d,  $J$  = 8.6 Hz, 2H), 7.23 (d,  $J$  = 8.6 Hz, 2H), 3.95 – 3.85 (m, 5H), 2.33 (s, 3H); <sup>13</sup>C NMR (101 MHz, CHLOROFORM-D)  $\delta$  191.8 (t,  $J$  = 5.9 Hz), 168.8, 163.8 (t,  $J$  = 31.5 Hz), 155.3, 133.1, 130.0, 122.3, 114.4 (t,  $J$  = 250.0 Hz), 53.7, 43.9 (t,  $J$  = 24.6 Hz), 21.2; <sup>19</sup>F NMR (565 MHz, CHLOROFORM-D)  $\delta$  -104.19 (t,  $J$  = 13.4 Hz). GC-MS  $m/z$  [M]<sup>+</sup> 286.

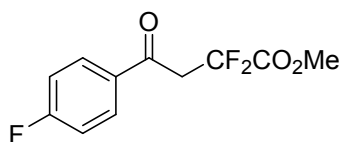

**Methyl 2,2-difluoro-4-(4-fluorophenyl)-4-oxobutanoate (3e)**<sup>6</sup>: white solid, 32.5 mg (66% yield); <sup>1</sup>H NMR (400 MHz, CHLOROFORM-D)  $\delta$  8.00 – 7.91 (m, 2H), 7.17 (dd,  $J$  = 11.0, 4.3 Hz, 2H), 3.95 – 3.85 (m, 5H); <sup>13</sup>C NMR (101 MHz, CHLOROFORM-D)  $\delta$  191.5 (t,  $J$  = 6.1 Hz), 166.5 (d,  $J$  = 256.9 Hz), 163.9 (t,  $J$  = 31.5 Hz), 132.1, 131.1 (d,  $J$  = 9.6 Hz), 116.3 (d,  $J$  = 22.1 Hz), 114.4 (t,  $J$  = 250.2 Hz), 53.7 43.9 (t,  $J$  = 24.6 Hz); <sup>19</sup>F NMR (565 MHz, CHLOROFORM-D)  $\delta$  -102.65 (qd,  $J$  = 8.2, 5.2 Hz, 1F), -104.20 (t,  $J$  = 13.2 Hz, 2F). GC-MS  $m/z$  [M]<sup>+</sup> 246.

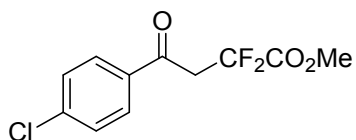

**Methyl 4-(4-chlorophenyl)-2,2-difluoro-4-oxobutanoate (3f)**<sup>6</sup>: white solid, 25.2 mg (48% yield); <sup>1</sup>H NMR (400 MHz, CHLOROFORM-D)  $\delta$  7.86 (d,  $J = 8.3$  Hz, 2H), 7.47 (d,  $J = 8.4$  Hz, 2H), 3.94 – 3.85 (m, 5H); <sup>13</sup>C NMR (101 MHz, CHLOROFORM-D)  $\delta$  191.9 (t,  $J = 5.9$  Hz), 163.8 (t,  $J = 31.4$  Hz), 141.0, 133.9, 129.7, 129.4, 114.3 (t,  $J = 250.2$  Hz), 53.7, 43.9 (t,  $J = 24.7$  Hz); <sup>19</sup>F NMR (565 MHz, CHLOROFORM-D)  $\delta$  -104.18 (t,  $J = 13.2$  Hz). GC-MS  $m/z$  [M]<sup>+</sup> 262.

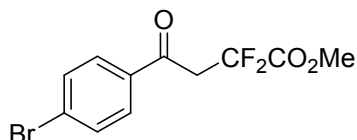

**Methyl 4-(4-bromophenyl)-2,2-difluoro-4-oxobutanoate (3g)**<sup>6</sup>: white solid, 41.2 mg (67% yield); <sup>1</sup>H NMR (400 MHz, CHLOROFORM-D)  $\delta$  7.80 – 7.76 (m, 2H), 7.66 – 7.62 (m, 2H), 3.93 – 3.84 (m, 5H); <sup>13</sup>C NMR (101 MHz, CHLOROFORM-D)  $\delta$  192.1 (t,  $J = 6.0$  Hz), 163.8 (t,  $J = 31.4$  Hz), 134.3, 132.4, 129.7, 114.3 (t,  $J = 250.3$  Hz), 53.7, 43.9 (t,  $J = 24.6$  Hz); <sup>19</sup>F NMR (565 MHz, CHLOROFORM-D)  $\delta$  -104.14 (t,  $J = 13.1$  Hz). GC-MS  $m/z$  [M]<sup>+</sup> 307.

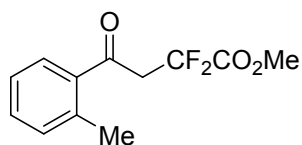

**Methyl 2,2-difluoro-4-oxo-4-(o-tolyl)butanoate(3h)**<sup>7</sup>: colorless oil liquid, 35.3 mg (73% yield); <sup>1</sup>H NMR (400 MHz, CHLOROFORM-D)  $\delta$  7.67 (d,  $J = 7.7$  Hz, 1H), 7.44 (t,  $J = 7.2$  Hz, 1H), 7.29 (dd,  $J = 15.9, 8.0$  Hz, 2H), 3.94 – 3.82 (m, 5H), 2.52 (s, 3H); <sup>13</sup>C NMR (101 MHz, CHLOROFORM-D)  $\delta$  195.9 (t,  $J = 5.8$  Hz), 164.0 (t,  $J = 31.5$  Hz), 139.8, 135.4, 132.8, 132.6, 129.3, 126.1, 114.5 (t,  $J = 249.8$  Hz), 53.6, 46.2 (t,  $J = 24.2$  Hz), 21.8; <sup>19</sup>F NMR (565 MHz, CHLOROFORM-D)  $\delta$  -104.39 (t,  $J = 13.4$  Hz). GC-MS  $m/z$  [M]<sup>+</sup> 242.

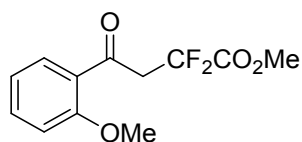

**Methyl 2,2-difluoro-4-(2-methoxyphenyl)-4-oxobutanoate (3i)**<sup>7</sup>: white solid, 41.3 mg (80% yield); <sup>1</sup>H NMR (400 MHz, CHLOROFORM-D)  $\delta$  7.83 (dd,  $J = 7.8, 1.8$  Hz, 1H), 7.53 (ddd,  $J = 8.9, 7.5, 1.8$  Hz, 1H), 7.04 – 6.98 (m, 2H), 4.01 – 3.94 (m, 5H), 3.91

(s, 3H);  $^{13}\text{C}$  NMR (101 MHz, CHLOROFORM-D)  $\delta$  193.9 (t,  $J = 6.7$  Hz), 164.3 (t,  $J = 31.6$  Hz), 159.6, 135.4, 131.0, 125.7, 121.0, 114.5 (t,  $J = 248.6$  Hz), 111.8, 55.7, 53.5, 49.4 (t,  $J = 24.6$  Hz);  $^{19}\text{F}$  NMR (565 MHz, CHLOROFORM-D)  $\delta$  -104.86 (td,  $J = 13.7$ , 2.6 Hz). GC-MS  $m/z$   $[\text{M}]^+$  258.

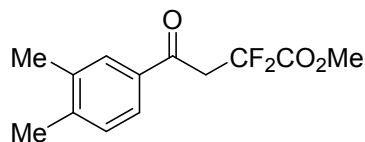

**Methyl 4-(3,4-dimethylphenyl)-2,2-difluoro-4-oxobutanoate (3j)**: yellow solid, 32.7 mg (64% yield); mp: 44.0-45.2 °C;  $^1\text{H}$  NMR (400 MHz, CHLOROFORM-D)  $\delta$  7.67 (s, 1H), 7.63 (dd,  $J = 7.9$ , 1.7 Hz, 1H), 7.23 (d,  $J = 7.9$  Hz, 1H), 3.92 – 3.84 (m, 5H), 2.32 (d,  $J = 4.7$  Hz, 6H);  $^{13}\text{C}$  NMR (101 MHz, CHLOROFORM-D)  $\delta$  192.9 (t,  $J = 5.8$  Hz), 164.0 (t,  $J = 31.6$  Hz), 144.2, 137.5, 133.6, 130.2, 129.3, 126.1, 114.6 (t,  $J = 249.8$  Hz), 53.6, 43.9 (t,  $J = 24.4$  Hz), 20.3, 19.9;  $^{19}\text{F}$  NMR (565 MHz, CHLOROFORM-D)  $\delta$  -104.30 (t,  $J = 13.5$  Hz). GC-MS  $m/z$   $[\text{M}]^+$  256.

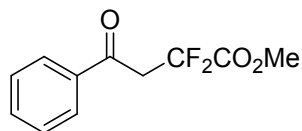

**Methyl 2,2-difluoro-4-oxo-4-phenylbutanoate (3k)**<sup>6</sup>: colorless oil liquid, 33.8 mg (74% yield);  $^1\text{H}$  NMR (400 MHz, CHLOROFORM-D)  $\delta$  7.92 (dd,  $J = 8.3$ , 1.1 Hz, 2H), 7.65 – 7.59 (m, 1H), 7.49 (dd,  $J = 10.8$ , 4.8 Hz, 2H), 3.96 – 3.88 (m, 5H);  $^{13}\text{C}$  NMR (101 MHz, CHLOROFORM-D)  $\delta$  193.1 (t,  $J = 5.9$  Hz), 163.9 (t,  $J = 31.6$  Hz), 135.6, 134.4, 129.0, 128.3, 114.5 (t,  $J = 250.0$  Hz), 53.6, 44.0 (t,  $J = 24.5$  Hz);  $^{19}\text{F}$  NMR (565 MHz, CHLOROFORM-D)  $\delta$  -104.25 (t,  $J = 13.2$  Hz). GC-MS  $m/z$   $[\text{M}]^+$  228.

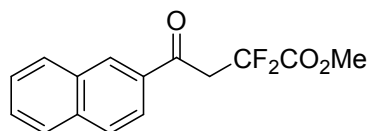

**Methyl 2,2-difluoro-4-(naphthalen-2-yl)-4-oxobutanoate (3l)**<sup>6</sup>: colorless oil liquid, 22.3 mg (40% yield);  $^1\text{H}$  NMR (400 MHz, CHLOROFORM-D)  $\delta$  8.41 (s, 1H), 7.96 (dd,  $J = 8.7$ , 1.8 Hz, 2H), 7.93 – 7.86 (m, 2H), 7.67 – 7.55 (m, 2H), 4.06 (t,  $J = 13.3$  Hz, 2H), 3.94 (s, 3H);  $^{13}\text{C}$  NMR (101 MHz, CHLOROFORM-D)  $\delta$  193.0 (t,  $J = 5.9$  Hz), 164.0 (t,  $J = 31.5$  Hz), 136.1, 133.0, 132.4, 130.5, 129.8, 129.3, 129.0, 128.0, 127.3,

123.4, 114.6 (t,  $J = 250.1$  Hz), 53.7, 44.1 (t,  $J = 24.6$  Hz);  $^{19}\text{F}$  NMR (565 MHz, CHLOROFORM-D)  $\delta$  -104.14 (t,  $J = 13.5$  Hz). GC-MS  $m/z$   $[\text{M}]^+$  278.

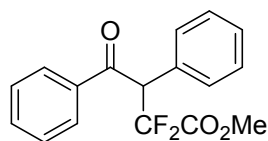

**Methyl 2,2-difluoro-4-oxo-3,4-diphenylbutanoate (3m)**: white solid, 37.1 mg (61% yield); mp: 108.9-110.0 °C;  $^1\text{H}$  NMR (600 MHz, CHLOROFORM-D)  $\delta$  7.84 (d,  $J = 7.4$  Hz, 2H), 7.48 (t,  $J = 7.4$  Hz, 1H), 7.38 – 7.32 (m, 7H), 5.46 (dd,  $J = 19.0, 10.0$  Hz, 1H), 3.87 (s, 3H);  $^{13}\text{C}$  NMR (101 MHz, CHLOROFORM-D)  $\delta$  194.8 (d,  $J = 8.2$  Hz), 164.5 (t,  $J = 31.9$  Hz), 135.0, 133.8, 130.6, 130.3, 129.2, 128.9, 128.8, 113.8 (dd,  $J = 264.0, 245.2$  Hz), 58.3 (dd,  $J = 23.8, 20.2$  Hz), 58.0, 53.7;  $^{19}\text{F}$  NMR (565 MHz, CHLOROFORM-D)  $\delta$  -103.48 (dd,  $J = 273.4, 8.7$  Hz, 1F), -112.02 (dd,  $J = 274.3, 18.5$  Hz, 1F). GC-MS  $m/z$   $[\text{M}]^+$  304. HRMS (ESI):  $m/z$   $[\text{M}+\text{H}]^+$  Calculated for:  $\text{C}_{17}\text{H}_{15}\text{F}_2\text{O}_3\text{H}$ : 305.0984; Found: 305.0989.

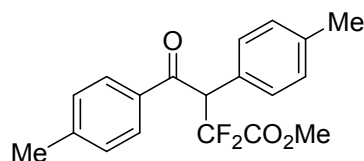

**Methyl 2,2-difluoro-4-oxo-3,4-di-p-tolylbutanoate (3n)**: white solid, 56.4 mg (85% yield); mp: 117.3-118.5 °C;  $^1\text{H}$  NMR (400 MHz, CHLOROFORM-D)  $\delta$  7.77 – 7.70 (m, 2H), 7.23 (d,  $J = 8.0$  Hz, 2H), 7.13 (dd,  $J = 8.3, 2.7$  Hz, 4H), 5.40 (dd,  $J = 19.0, 10.2$  Hz, 1H), 3.85 (s, 3H), 2.30 (d,  $J = 7.7$  Hz, 6H);  $^{13}\text{C}$  NMR (101 MHz, CHLOROFORM-D)  $\delta$  194.5 (d,  $J = 8.3$  Hz), 164.6 (t,  $J = 31.9$  Hz), 144.7, 138.7, 132.6, 130.4, 130.0, 129.4, 129.3, 127.5, 113.9 (dd,  $J = 263.2, 244.4$  Hz), 58.1, 57.9 (dd,  $J = 23.7, 20.2$  Hz), 21.7, 21.2;  $^{19}\text{F}$  NMR (565 MHz, CHLOROFORM-D)  $\delta$  -103.51 (dd,  $J = 273.8, 10.0$  Hz, 1F), -112.01 (dd,  $J = 273.8, 19.0$  Hz, 1F). GC-MS  $m/z$   $[\text{M}]^+$  332. HRMS (ESI):  $m/z$   $[\text{M}+\text{H}]^+$  Calculated for:  $\text{C}_{19}\text{H}_{18}\text{F}_2\text{O}_3\text{H}$ : 333.1297; Found: 333.1294.

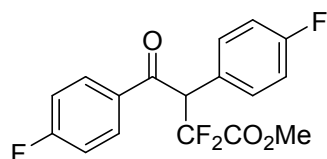

**Methyl 2,2-difluoro-3,4-bis(4-fluorophenyl)-4-oxobutanoate (3o)**: colorless oil liquid, 41.5 mg (61% yield); mp=41.2-42.1 °C;  $^1\text{H}$  NMR (400 MHz, CHLOROFORM-

D)  $\delta$  7.88 – 7.81 (m, 2H), 7.31 (dd,  $J = 8.4, 5.3$  Hz, 2H), 7.07 – 7.00 (m, 4H), 5.39 (dd,  $J = 18.7, 9.9$  Hz, 1H), 3.87 (s, 3H);  $^{13}\text{C}$  NMR (101 MHz, CHLOROFORM-D)  $\delta$  193.1 (d,  $J = 8.1$  Hz), 166.1 (d,  $J = 257.1$  Hz), 164.3 (t,  $J = 31.8$  Hz), 163.2 (d,  $J = 248.9$  Hz), 132.3 (d,  $J = 8.4$  Hz), 131.9 (d,  $J = 9.6$  Hz), 131.3, 126.0, 116.4 (d,  $J = 21.7$  Hz), 116.1 (d,  $J = 22.1$  Hz), 113.7 (dd,  $J = 286.4, 268.3$  Hz), 57.3 (dd,  $J = 23.9, 20.4$  Hz), 53.8;  $^{19}\text{F}$  NMR (565 MHz, CHLOROFORM-D)  $\delta$  -102.94 (tt,  $J = 7.8, 5.3$  Hz, 1F), -103.57 (dd,  $J = 275.7, 9.9$  Hz, 1F), -112.18 (tt,  $J = 8.5, 5.1$  Hz, 1F), -112.21 (dd,  $J = 275.6, 18.7$  Hz, 1F). GC-MS  $m/z$   $[\text{M}]^+$  340. HRMS (ESI):  $m/z$   $[\text{M}+\text{H}]^+$  Calculated for:  $\text{C}_{17}\text{H}_{12}\text{F}_4\text{O}_3\text{H}$ : 341.0795; Found: 341.0789.

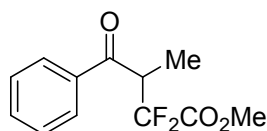

**Methyl 2,2-difluoro-3-methyl-4-oxo-4-phenylbutanoate (3p)**<sup>6</sup>: colorless oil liquid, 27.1 mg (56% yield);  $^1\text{H}$  NMR (400 MHz, CHLOROFORM-D)  $\delta$  7.92 (dd,  $J = 5.2, 3.4$  Hz, 2H), 7.64 – 7.58 (m, 1H), 7.49 (dd,  $J = 10.7, 4.7$  Hz, 2H), 4.37 – 4.25 (m, 1H), 3.85 (s, 3H), 1.48 (d,  $J = 7.4$  Hz, 3H);  $^{13}\text{C}$  NMR (101 MHz, CHLOROFORM-D)  $\delta$  197.8 (d,  $J = 5.7$  Hz), 164.2 (t,  $J = 32.1$  Hz), 135.3, 134.0, 129.0, 128.7, 115.2 (dd,  $J = 259.0, 248.9$  Hz), 53.5, 46.4 (dd,  $J = 23.6, 22.0$  Hz), 11.5, 11.5, 11.4;  $^{19}\text{F}$  NMR (565 MHz, CHLOROFORM-D)  $\delta$  -105.46 (dd,  $J = 270.0, 11.1$  Hz, 1F), -112.19 (dd,  $J = 270.0, 14.9$  Hz, 1F). GC-MS  $m/z$   $[\text{M}]^+$  242.

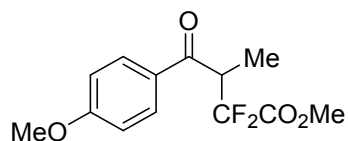

**Methyl 2,2-difluoro-4-(4-methoxyphenyl)-3-methyl-4-oxobutanoate (3q)**<sup>7</sup>: white solid, 25.2 mg (48% yield);  $^1\text{H}$  NMR (400 MHz, CHLOROFORM-D)  $\delta$  7.94 – 7.88 (m, 2H), 6.99 – 6.93 (m, 2H), 4.25 (ddt,  $J = 14.6, 11.4, 7.3$  Hz, 1H), 3.91 – 3.83 (m, 6H), 1.47 (d,  $J = 7.3$  Hz, 3H);  $^{13}\text{C}$  NMR (101 MHz, CHLOROFORM-D)  $\delta$  196.1 (d,  $J = 5.7$  Hz), 164.2 (t,  $J = 32.1$  Hz), 131.1, 128.2, 117.9, 115.4 (dd,  $J = 258.2, 248.9$  Hz), 55.7, 53.5, 46.1 (dd,  $J = 23.6, 21.9$  Hz), 11.8;  $^{19}\text{F}$  NMR (565 MHz, CHLOROFORM-D)  $\delta$  -



105.39 (dd,  $J = 268.5, 11.5$  Hz, 1F), -111.82 (dd,  $J = 268.5, 14.5$  Hz, 1F). GC-MS  $m/z$  [M]<sup>+</sup> 272.

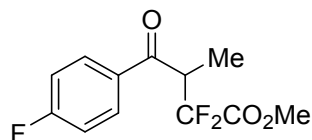

**Methyl 2,2-difluoro-4-(4-fluorophenyl)-3-methyl-4-oxobutanoate (3r)**<sup>7</sup>: colorless oil liquid, 32.2 mg (62% yield); <sup>1</sup>H NMR (400 MHz, CHLOROFORM-D)  $\delta$  7.96 (dd,  $J = 8.6, 5.4$  Hz, 2H), 7.17 (t,  $J = 8.4$  Hz, 2H), 4.32 – 4.20 (m, 1H), 3.86 (s, 3H), 1.47 (d,  $J = 7.4$  Hz, 3H); <sup>13</sup>C NMR (101 MHz, CHLOROFORM-D)  $\delta$  196.2 (d,  $J = 5.1$  Hz), 166.3 (d,  $J = 256.6$  Hz), 164.1 (t,  $J = 32.0$  Hz), 131.8, 131.5 (d,  $J = 9.5$  Hz), 116.2 (d,  $J = 22.0$  Hz), 115.2 (dd,  $J = 259.0, 249.4$  Hz), 53.6, 46.3 (dd,  $J = 23.7, 21.9$  Hz), 11.5 (t,  $J = 4.4$  Hz); <sup>19</sup>F NMR (565 MHz, CHLOROFORM-D)  $\delta$  -103.43 (tt,  $J = 7.9, 5.4$  Hz, 1F), -105.56 (dd,  $J = 270.2, 11.3$  Hz, 1F), -111.76 (dd,  $J = 270.2, 14.4$  Hz, 1F). GC-MS  $m/z$  [M]<sup>+</sup> 260.

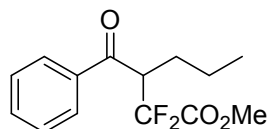

**Methyl 3-benzoyl-2,2-difluorohexanoate (3s)**: colorless oil liquid, 32.9 mg (61% yield); <sup>1</sup>H NMR (400 MHz, CHLOROFORM-D)  $\delta$  7.95 (d,  $J = 8.1$  Hz, 2H), 7.65 – 7.57 (m, 1H), 7.50 (t,  $J = 7.6$  Hz, 2H), 4.34 – 4.23 (m, 1H), 3.82 (s, 3H), 1.99 (dq,  $J = 16.2, 8.0$  Hz, 1H), 1.90 – 1.80 (m, 1H), 1.40 – 1.30 (m, 2H), 0.90 (t,  $J = 7.3$  Hz, 3H); <sup>13</sup>C NMR (101 MHz, CHLOROFORM-D)  $\delta$  197.5 (dd,  $J = 4.5, 2.4$  Hz), 164.0 (t,  $J = 32.3$  Hz), 136.9, 134.0, 129.0, 128.6, 115.5 (dd,  $J = 258.5, 252.8$  Hz), 53.5, 50.6 (t,  $J = 21.7$  Hz), 29.2, 21.0, 14.2; <sup>19</sup>F NMR (565 MHz, CHLOROFORM-D)  $\delta$  -103.97 (dd,  $J = 265.6, 13.1$  Hz, 1F), -107.73 (dd,  $J = 265.6, 13.3$  Hz, 1F). GC-MS  $m/z$  [M]<sup>+</sup> 270. HRMS (ESI):  $m/z$  [M+H]<sup>+</sup> Calculated for: C<sub>14</sub>H<sub>16</sub>F<sub>2</sub>O<sub>3</sub>H: 271.1140; Found: 271.1145.

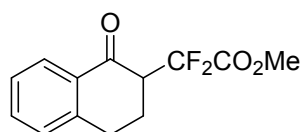

**Methyl 2,2-difluoro-2-(1-oxo-1,2,3,4-tetrahydronaphthalen-2-yl)acetate (3t)**<sup>6</sup>: colorless oil liquid, 30.00 mg (63% yield); <sup>1</sup>H NMR (600 MHz, CHLOROFORM-D)  $\delta$

7.98 (d,  $J = 8.1$  Hz, 1H), 7.51 (td,  $J = 7.6, 1.1$  Hz, 1H), 7.32 (t,  $J = 7.6$  Hz, 1H), 7.27 (d,  $J = 7.7$  Hz, 1H), 3.95 (s, 3H), 3.60 (ddt,  $J = 23.9, 13.7, 4.3$  Hz, 1H), 3.10 (dd,  $J = 8.4, 3.4$  Hz, 2H), 2.50 (ddd,  $J = 12.8, 7.8, 3.9$  Hz, 1H), 2.28 – 2.21 (m, 1H);  $^{13}\text{C}$  NMR (101 MHz, CHLOROFORM-D)  $\delta$  193.6 (d,  $J = 9.5$  Hz), 164.5 (dd,  $J = 32.4, 30.7$  Hz), 164.2, 143.9, 134.5, 131.6 (d,  $J = 3.5$  Hz), 129.0, 127.7, 127.2, 114.9 (dd,  $J = 258.6, 244.5$  Hz), 53.6, 52.4 (t,  $J = 24.3$  Hz), 28.4, 21.8 (t,  $J = 3.1$  Hz);  $^{19}\text{F}$  NMR (565 MHz, CHLOROFORM-D)  $\delta$  -109.42 (dd,  $J = 270.1, 4.3$  Hz, 1F), -119.04 (dd,  $J = 270.1, 24.1$  Hz, 1F). GC-MS  $m/z$   $[\text{M}]^+$  254.

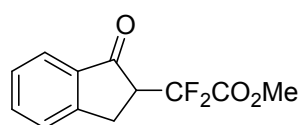

**Methyl 2,2-difluoro-2-(1-oxo-2,3-dihydro-1H-inden-2-yl)acetate (3u):** colorless oil liquid, 31.76 mg (33% yield);  $^1\text{H}$  NMR (400 MHz, CHLOROFORM-D)  $\delta$  7.74 (d,  $J = 7.7$  Hz, 1H), 7.63 (t,  $J = 7.4$  Hz, 1H), 7.51 (d,  $J = 7.7$  Hz, 1H), 7.39 (t,  $J = 7.5$  Hz, 1H), 3.95 (s, 3H), 3.65 (ddd,  $J = 25.2, 13.9, 6.9$  Hz, 1H), 3.38 (d,  $J = 6.6$  Hz, 2H);  $^{13}\text{C}$  NMR (101 MHz, CHLOROFORM-D)  $\delta$  199.5 (d,  $J = 8.1$  Hz), 163.6 (t,  $J = 31.7$  Hz), 153.0, 136.0, 135.8, 128.1, 126.7, 124.5, 115.1 (dd,  $J = 255.4, 250.8$  Hz), 53.8, 51.2 (t,  $J = 23.5$  Hz), 26.8;  $^{19}\text{F}$  NMR (565 MHz, CHLOROFORM-D)  $\delta$  -103.70 (dd,  $J = 266.4, 7.5$  Hz, 1F), -115.73 (dd,  $J = 266.3, 25.3$  Hz, 1F). GC-MS  $m/z$   $[\text{M}]^+$  240. HRMS (ESI):  $m/z$   $[\text{M}+\text{H}]^+$  Calculated for:  $\text{C}_{12}\text{H}_{10}\text{F}_2\text{O}_3\text{H}$ : 241.0671; Found: 241.0668.

Control experiments for insight on reaction mechanism

a) The experiment of turn on and off the light

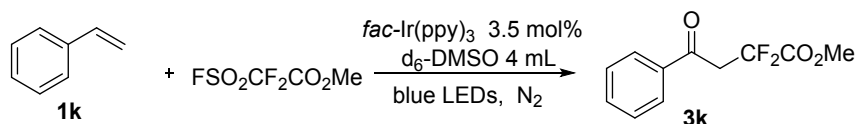

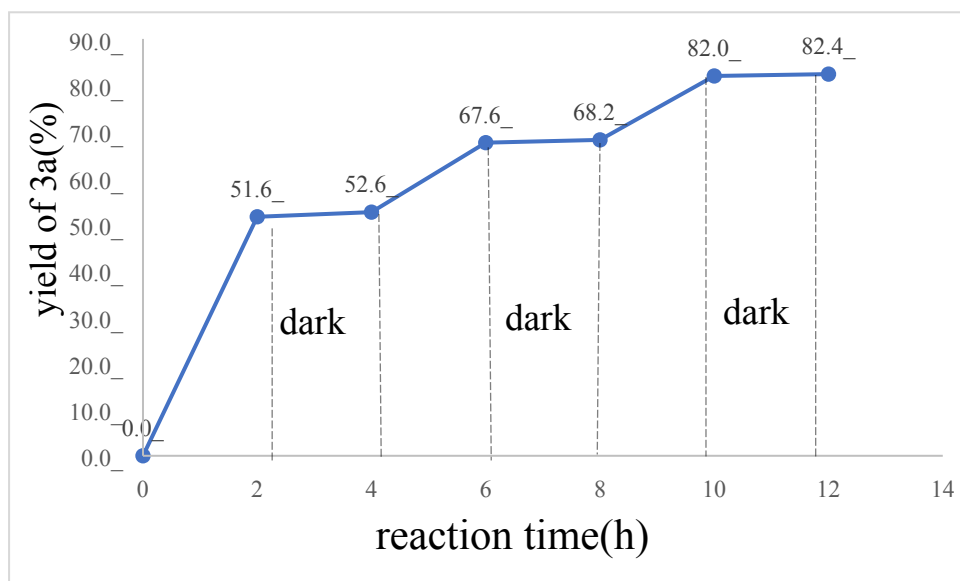

An NMR tube was charged with 0.6 mg *fac*-Ir(ppy)<sub>3</sub> (3.5 mol%) which was degassed and refilled with N<sub>2</sub> for 3 times. Styrene **1k** (2.6 mg, 0.025 mmol, 1.0 equiv), Chen reagent FSO<sub>2</sub>CF<sub>2</sub>CO<sub>2</sub>Me (16.8 mg, 0.0875 mmol, 3.5 equiv.) and dry d<sub>6</sub>-DMSO (0.5 mL) were added under N<sub>2</sub>. The resulting mixture was alternately irradiated with 3 W blue LEDs and set in dark totally for 12 h. The yield of **3k** was confirmed by <sup>1</sup>H NMR analysis of the crude sample using dibromomethane as internal standard.

b) Control experiment with TEMPO

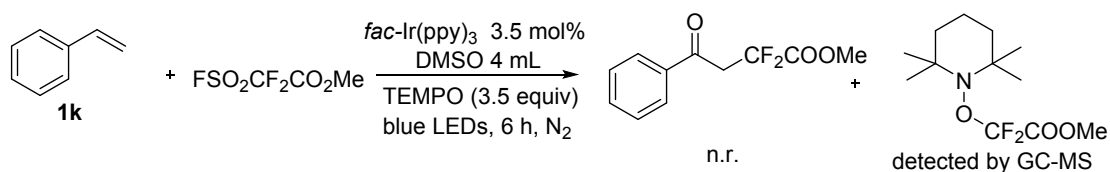

An oven-dried Schleck tube equipped with a stirrer bar was charged with 4.58 mg *fac*-Ir(ppy)<sub>3</sub> (3.5 mol%) and TEMPO (109.2 mg, 0.7 mmol, 3.5 equiv.), which was degassed and refilled with N<sub>2</sub> for 5 times. The alkenes **1k** (0.2 mmol, 1.0 equiv.), Chen's reagent FSO<sub>2</sub>CF<sub>2</sub>CO<sub>2</sub>Me (134.4 mg, 0.7 mmol, 3.5 equiv.) and dry DMSO (4 mL) were added under N<sub>2</sub>. The resulting mixture was irradiated for 6 h under room temperature by 3 W blue LEDs. Upon completion of the reaction, detect the reaction mixture with GC-MS.

c) The detection and transformation of alkoxyulfonium ion intermediate **5**.

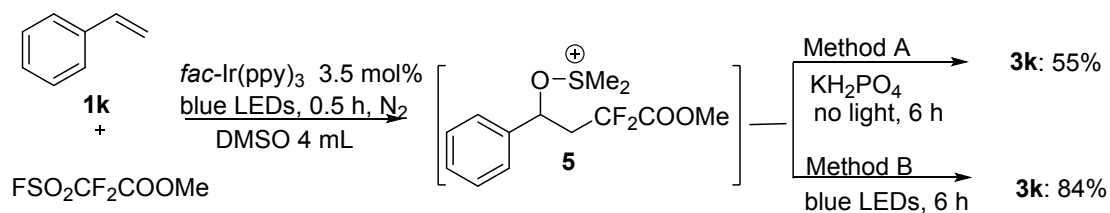

Oven-dried Schleck tube equipped with a stirrer bar was charged with 4.58 mg *fac*-Ir(ppy)<sub>3</sub> (3.5 mol%) which was degassed and refilled with N<sub>2</sub> for 3 times. The styrene **1k** (0.2 mmol, 1.0 equiv.), Chen reagent FSO<sub>2</sub>CF<sub>2</sub>CO<sub>2</sub>Me (134.4 mg, 0.7 mmol, 3.5 equiv.) and dry DMSO (4 mL) were added under N<sub>2</sub>. The mixture was irradiated for 0.5 h under room temperature by 3 W blue LEDs. Detect the reaction mixture by NMR and ESI. HRMS Calculated for cation **5** C<sub>13</sub>H<sub>17</sub>F<sub>2</sub>O<sub>3</sub>S<sup>+</sup> 291.0861, observed 291.0864, in the case the **3k** was observed by NMR in 32% yield. Add KH<sub>2</sub>PO<sub>4</sub> (54.4 mg, 0.4 mmol, 2.0 equiv.) to the first tube. The other one was irradiated for 6 h under room temperature by 3 W blue LEDs. They give the product **3k** in 55% and 84% yields, respectively.

1#1180-1265 RT: 2.75-2.95 AV: 86 SB: 137 0.19-0.33, 0.21-0.38 NL: 4.22E7  
T: FTMS + p ESI Full ms [50.0000-750.0000]

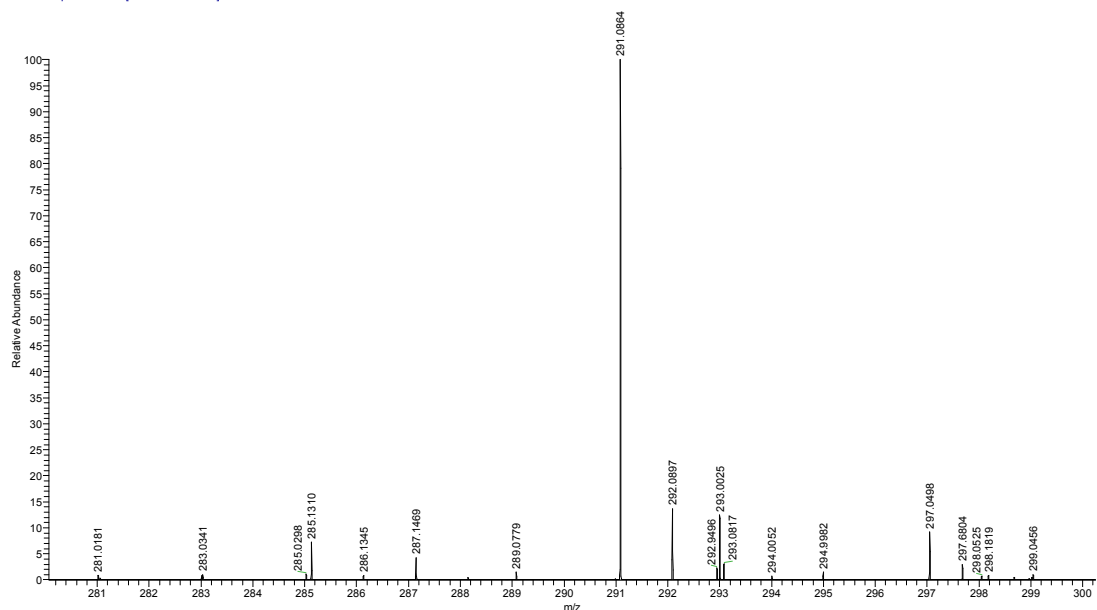

d) The reaction of (1-cyclohexylvinyl)benzene with Chen reagent under the photocatalytic reaction condition

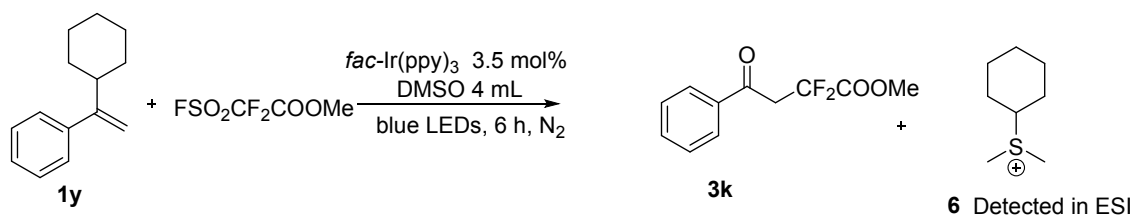

An oven-dried Schleck tube equipped with a stirrer bar was charged with 4.58 mg *fac*-Ir(ppy)<sub>3</sub> (3.5 mol%) which was degassed and refilled with N<sub>2</sub> for 3 times. The (1-cyclohexylvinyl)benzene **1y** (37.2 mg, 0.2 mmol, 1.0 equiv.), Chen reagent FSO<sub>2</sub>CF<sub>2</sub>CO<sub>2</sub>Me (134.4 mg, 0.7 mmol, 3.5 equiv.) and dry DMSO (4 mL) were added under N<sub>2</sub>. The resulting mixture was irradiated for 6 h under room temperature by 3 W blue LEDs. Upon completion of the reaction, detect the reaction mixture by NMR and ESI. Quenching the reaction with sat. aq. NaHCO<sub>3</sub> and dichloromethane (DCM) was added. The aqueous layer was extracted with DCM twice. The combined organic layer dried by Na<sub>2</sub>SO<sub>4</sub>, and concentrated in *vacuo* and the residue was purified by chromatography on silica gel. Product **3k** was obtained. HRMS Calculated for cation **6** C<sub>8</sub>H<sub>17</sub>S<sup>+</sup> 145.1048, observed 145.1053.

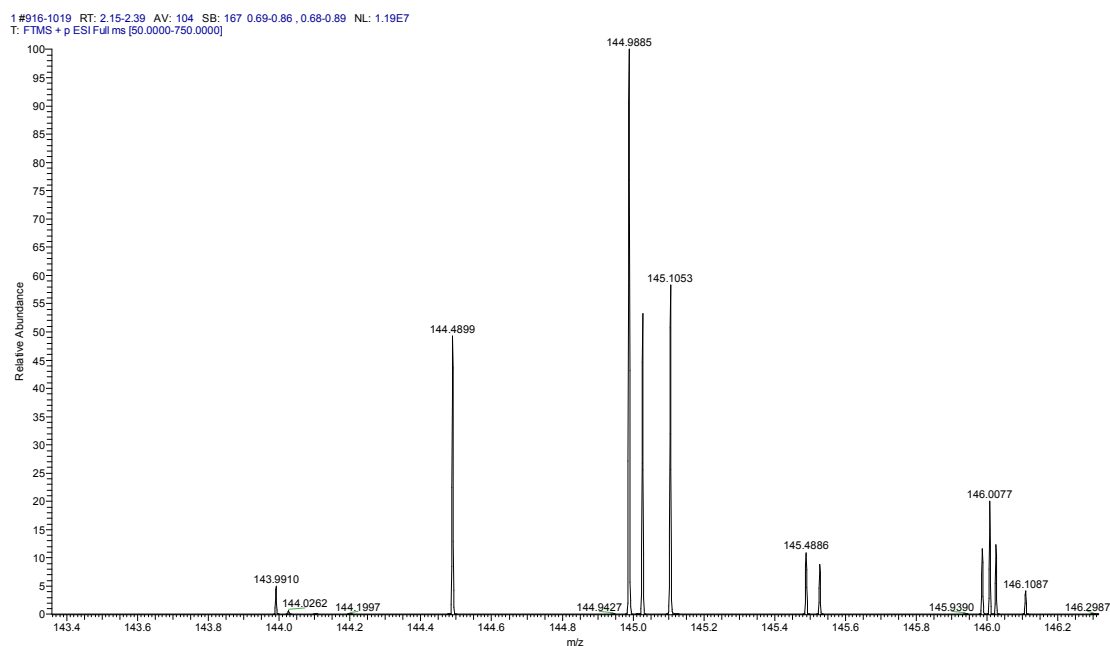

### 3. Reference

1. Gallagher, K. J.; Webster, R. L., *Chem. Commun.* **2014**, *50*, 12109.
2. Nojima, M.; Ohta, Y.; Yokozawa, T., *J. Am. Chem. Soc.* **2015**, *137*, 17, 5682.
3. Tomita, R.; Yasu, Y.; Koike, T.; Akita, M., *Angew. Chem. Int. Ed.*, **2014**, *53*, 7144 .
4. Liu, X.; Chen, W., *Organometallics*, **2012**, *31*, 6614.
5. Chatalova-Sazepin, C.; Wang, Q.; Sammis, G. M.; Zhu, J., *Angew. Chem. Int. Ed.*, **2015**, *54*, 5443.
6. Xia, Z.-H.; Gao, Z.-H.; Dai, L.; Ye, S., *J. Org. Chem.*, **2019**, *84*, 7388.
7. Yu, W.; Ouyang, Y.; Xu, X.-H.; Qing, F.-L., *Chin. J. Chem.*, **2018**, *36*, 1024.

#### 4. Copies of $^1\text{H}$ , $^{13}\text{C}$ NMR, and $^{19}\text{F}$ NMR Spectra

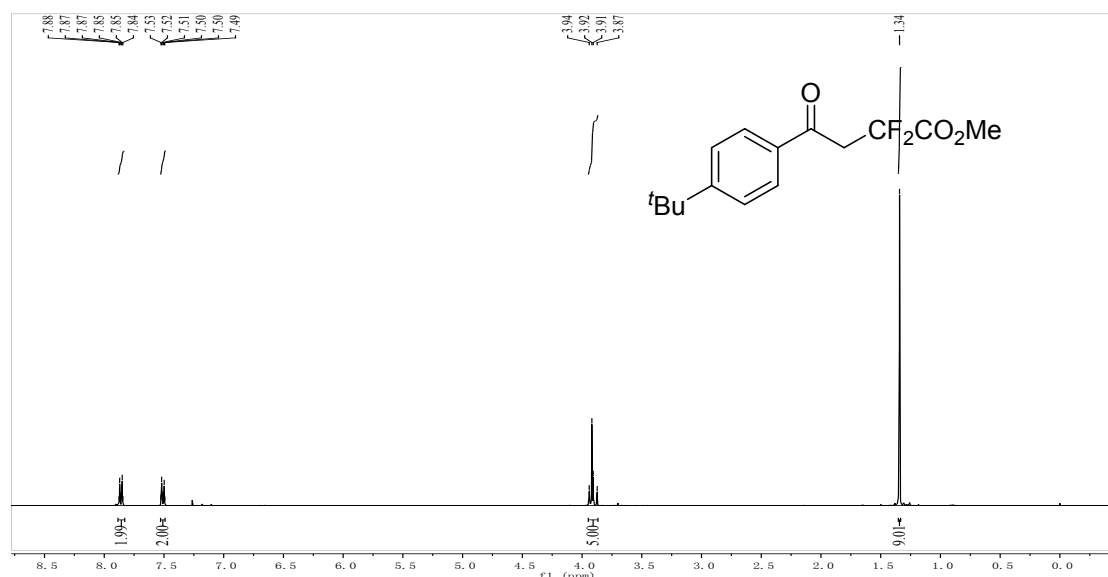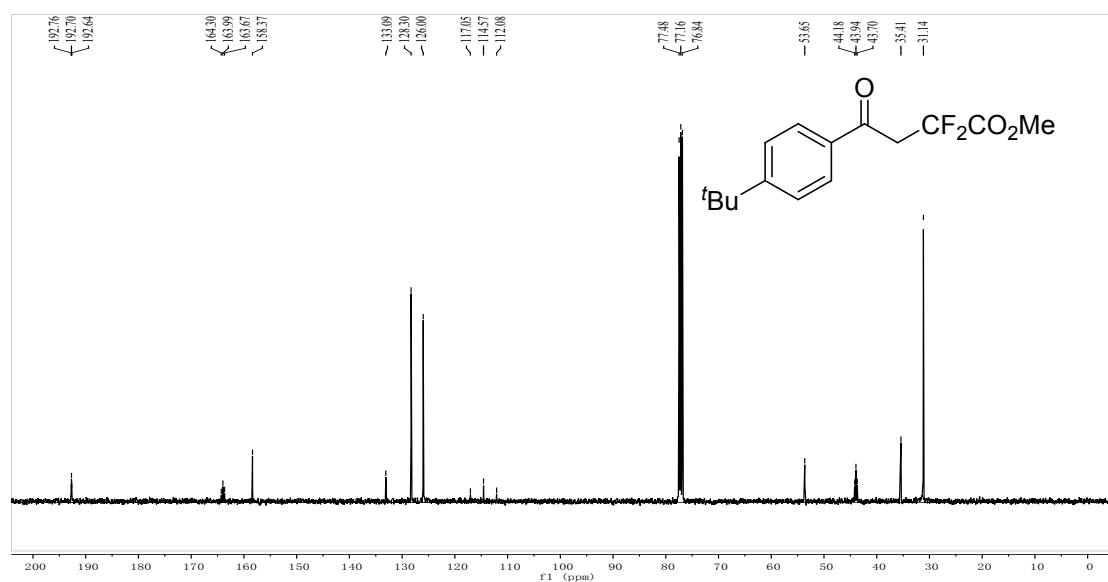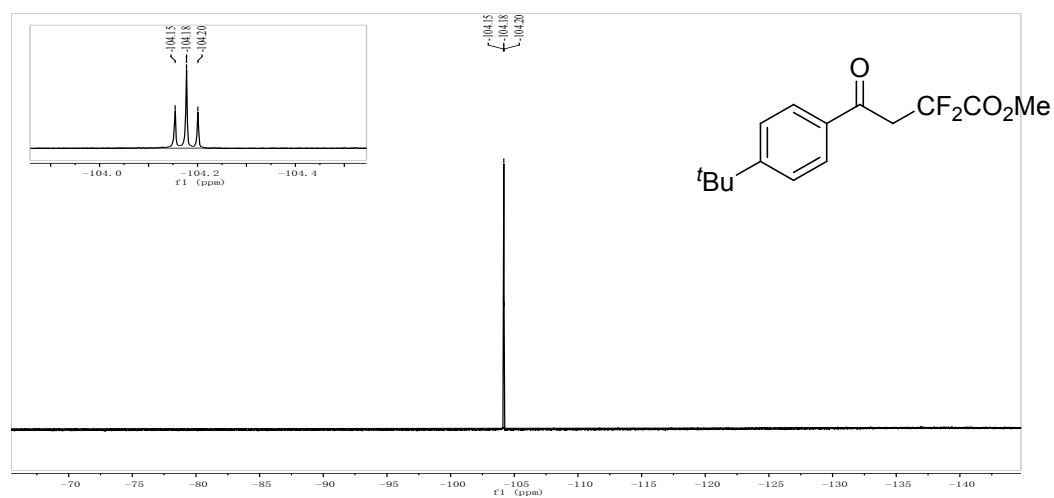

$^1\text{H}$  NMR,  $^{13}\text{C}\{^1\text{H}\}$  NMR, and  $^{19}\text{F}$  NMR of **3a**

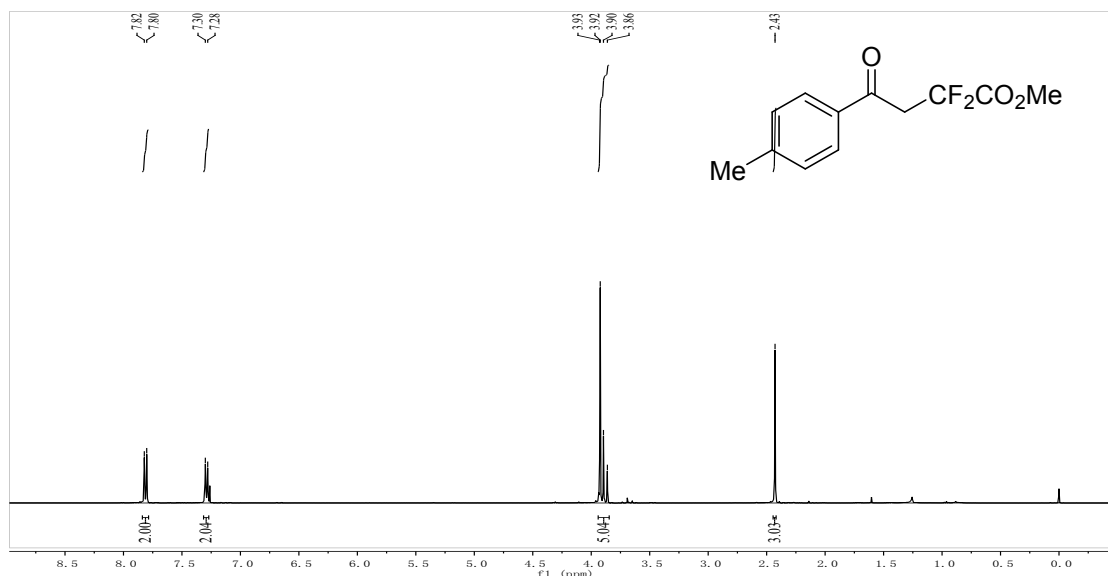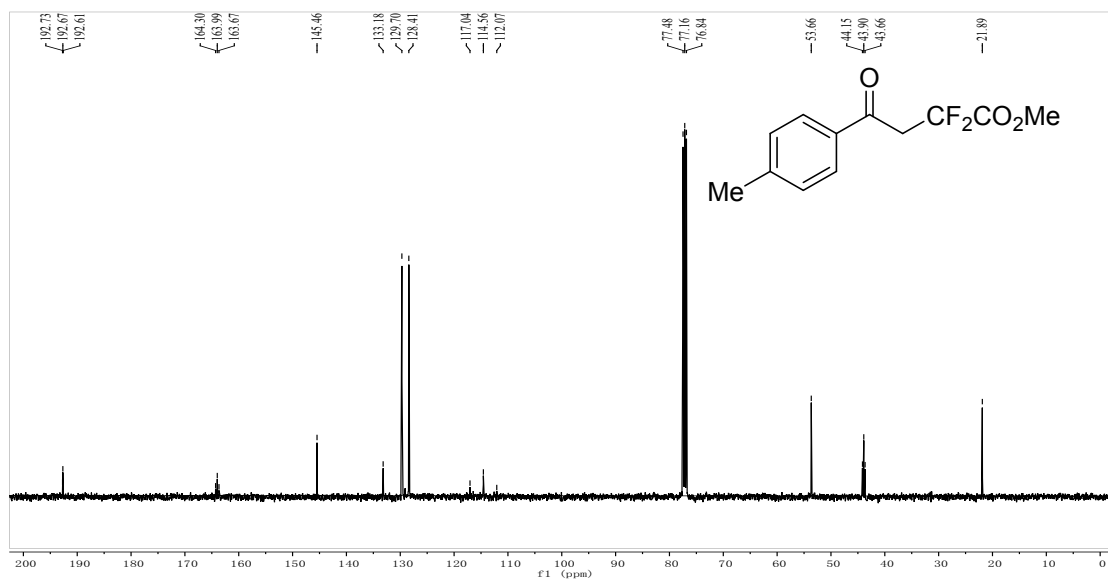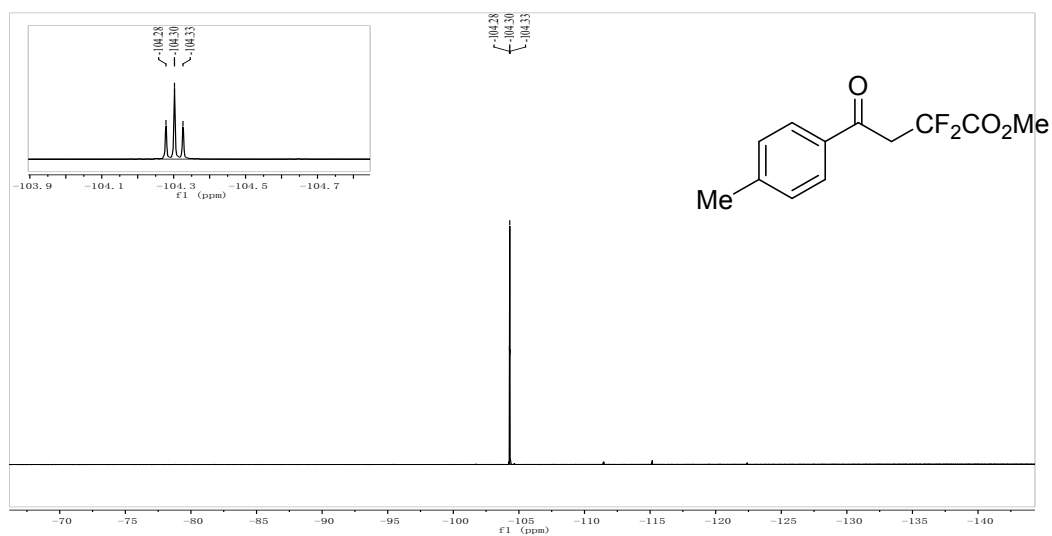

**<sup>1</sup>H NMR, <sup>13</sup>C{<sup>1</sup>H} NMR, and <sup>19</sup>F NMR of 3b**



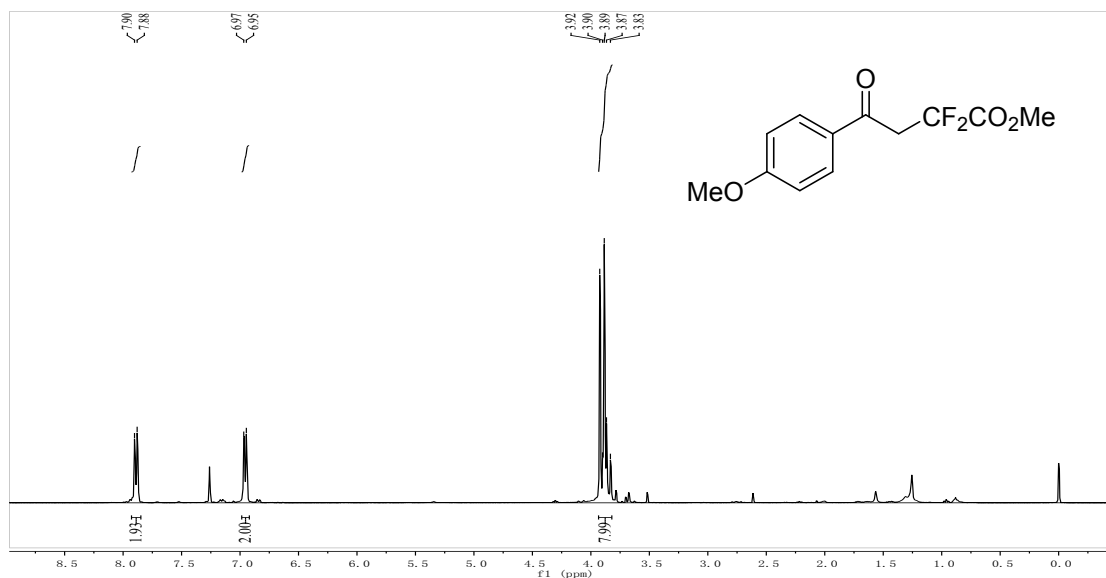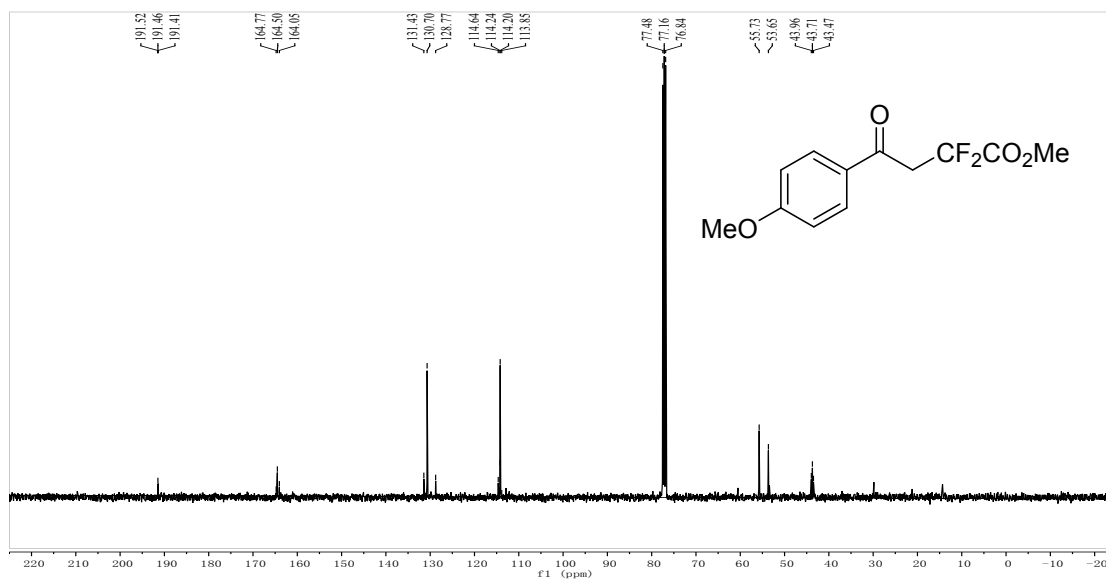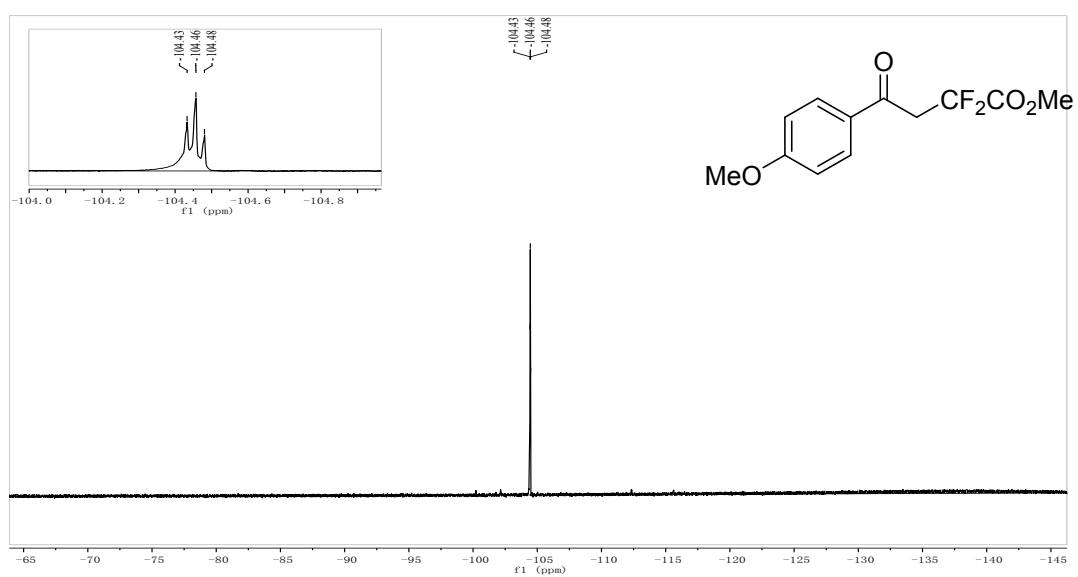

**<sup>1</sup>H NMR, <sup>13</sup>C{<sup>1</sup>H} NMR, and <sup>19</sup>F NMR of 3c**

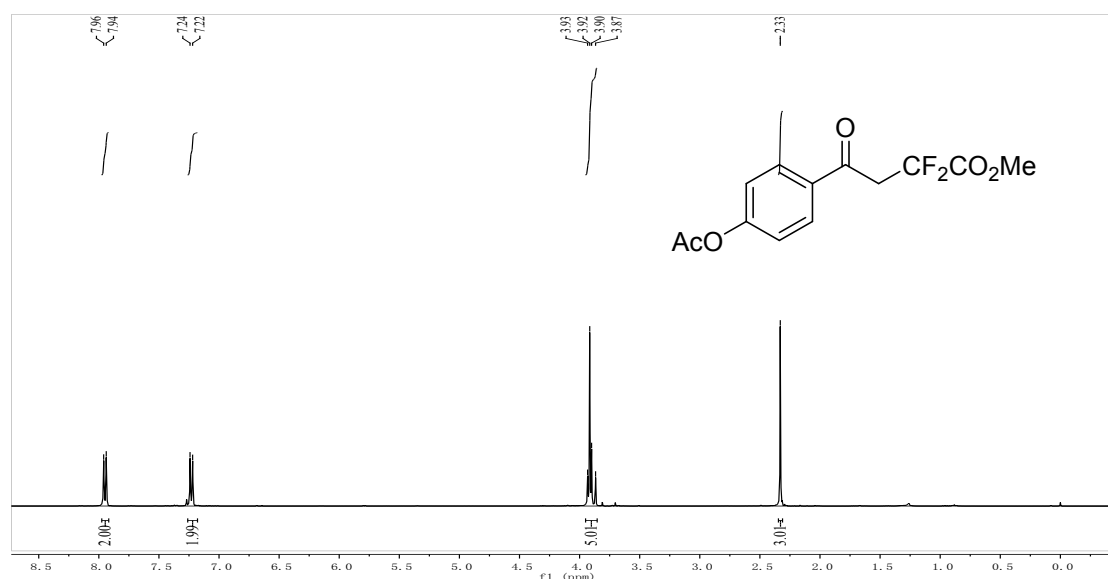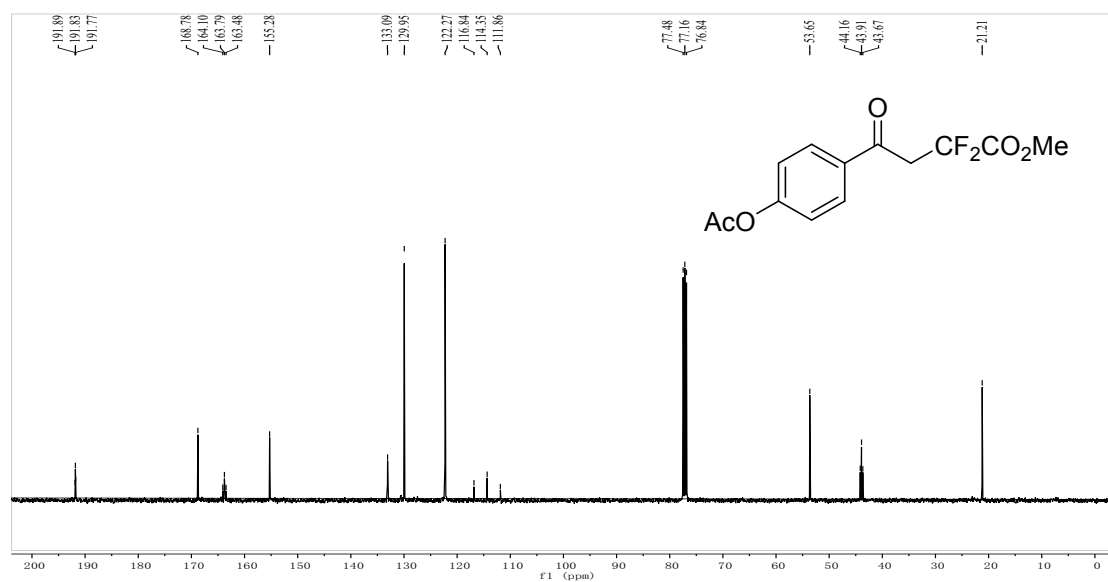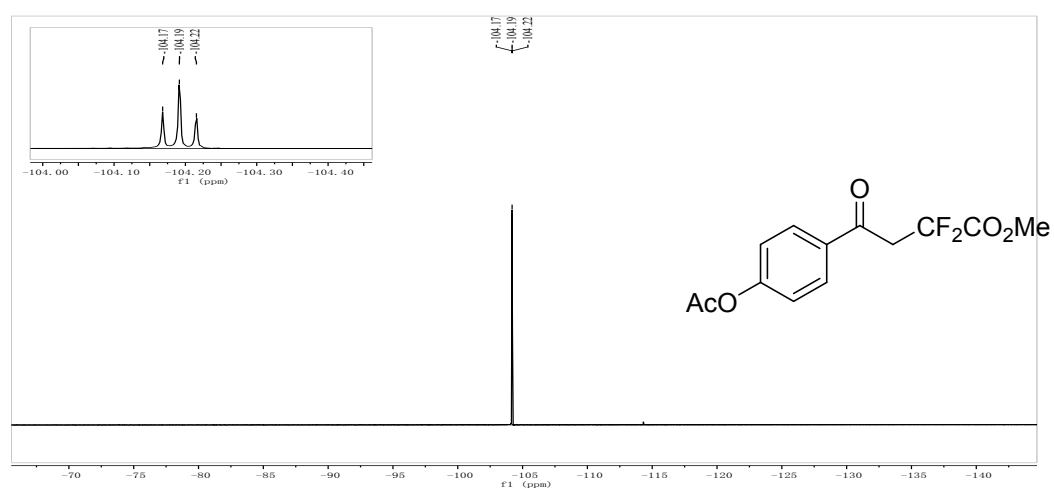

**<sup>1</sup>H NMR, <sup>13</sup>C{<sup>1</sup>H} NMR, and <sup>19</sup>F NMR of 3d**

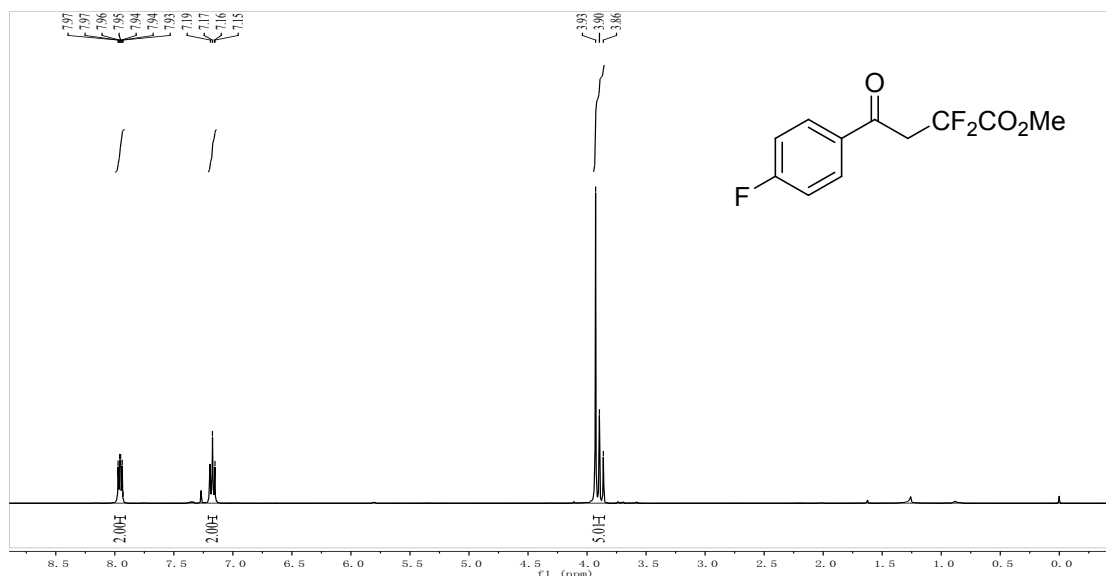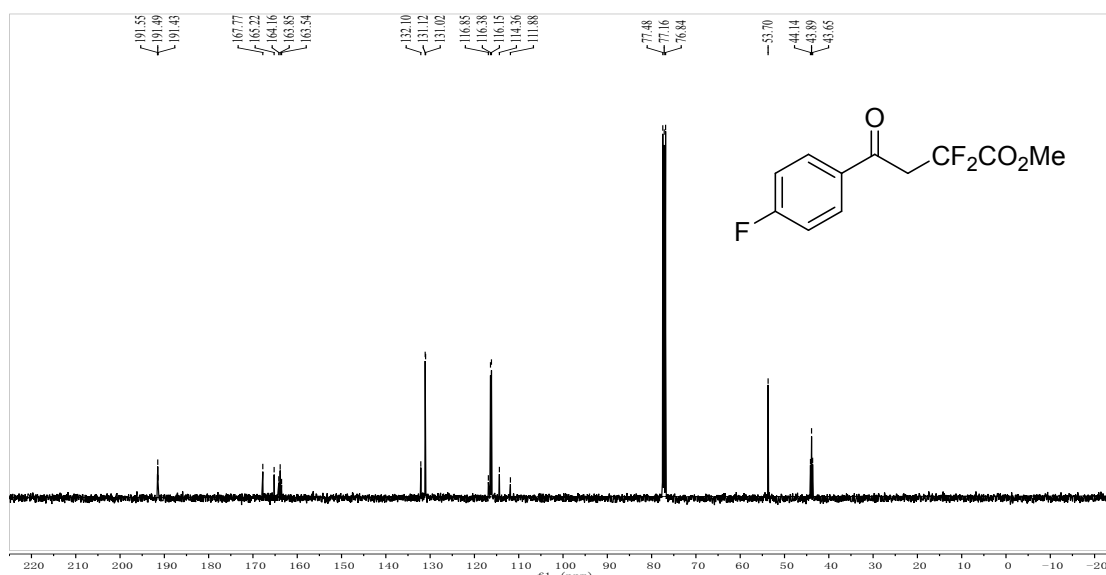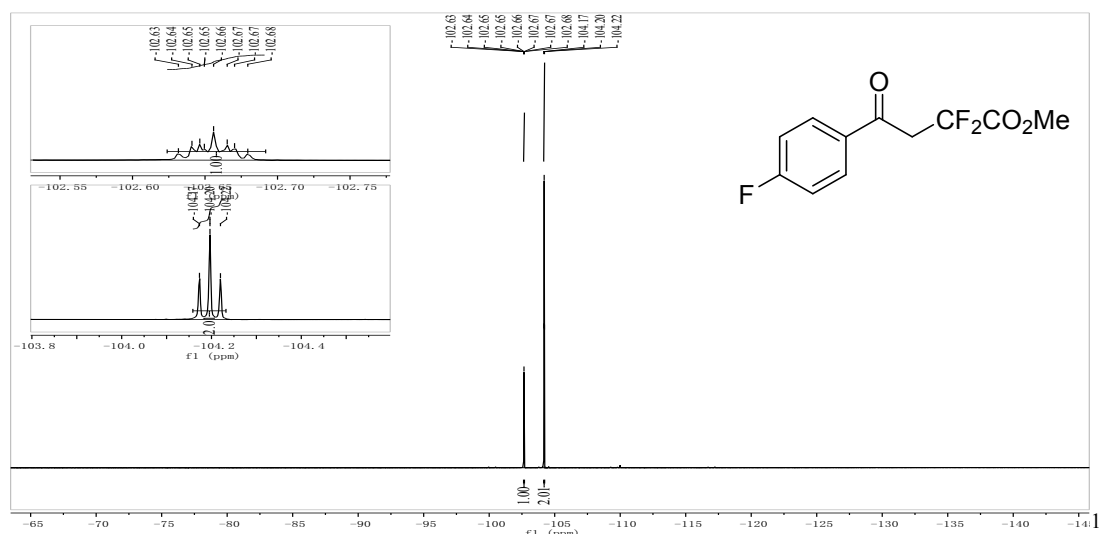

H NMR, <sup>13</sup>C{<sup>1</sup>H} NMR, and <sup>19</sup>F NMR of 3e

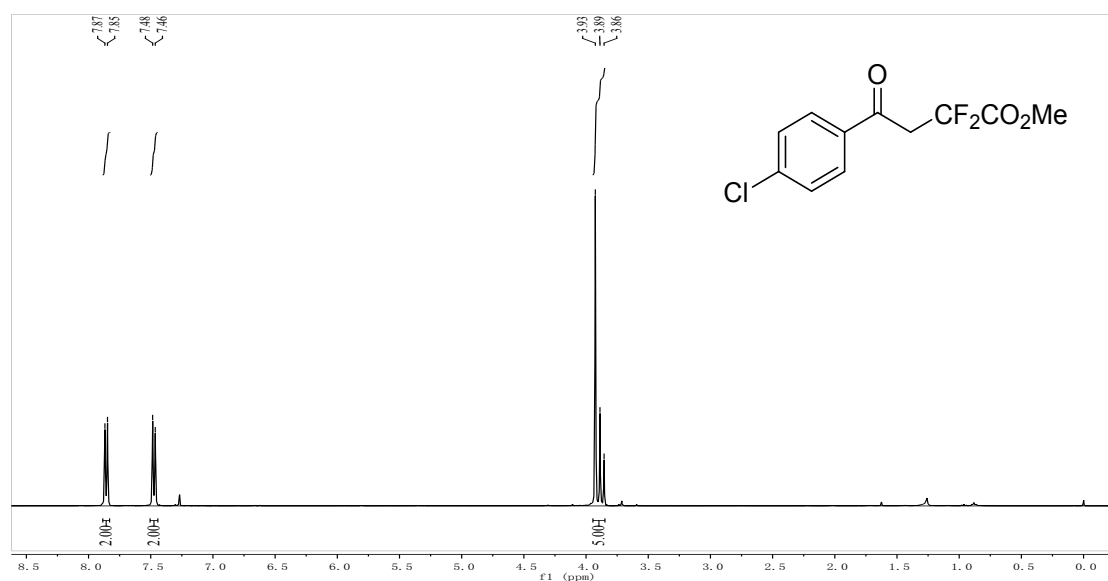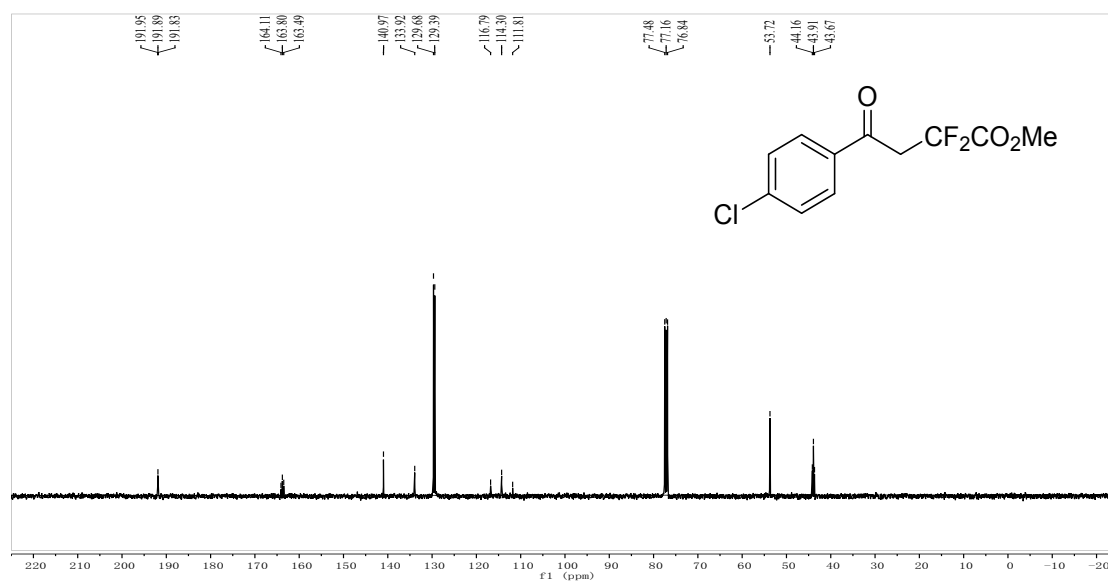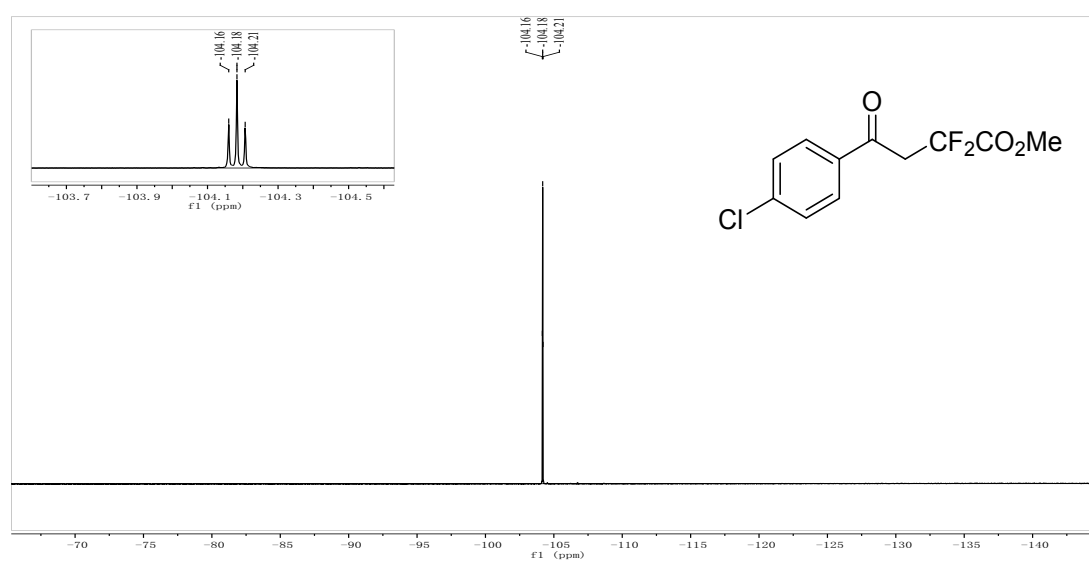

<sup>1</sup>H NMR, <sup>13</sup>C{<sup>1</sup>H} NMR, and <sup>19</sup>F NMR of **3f**

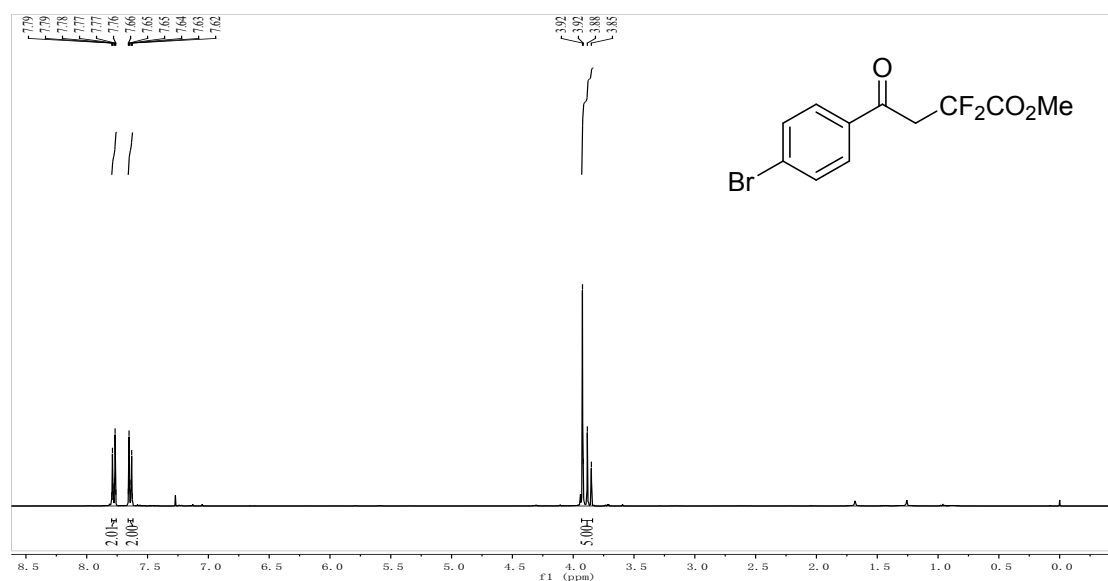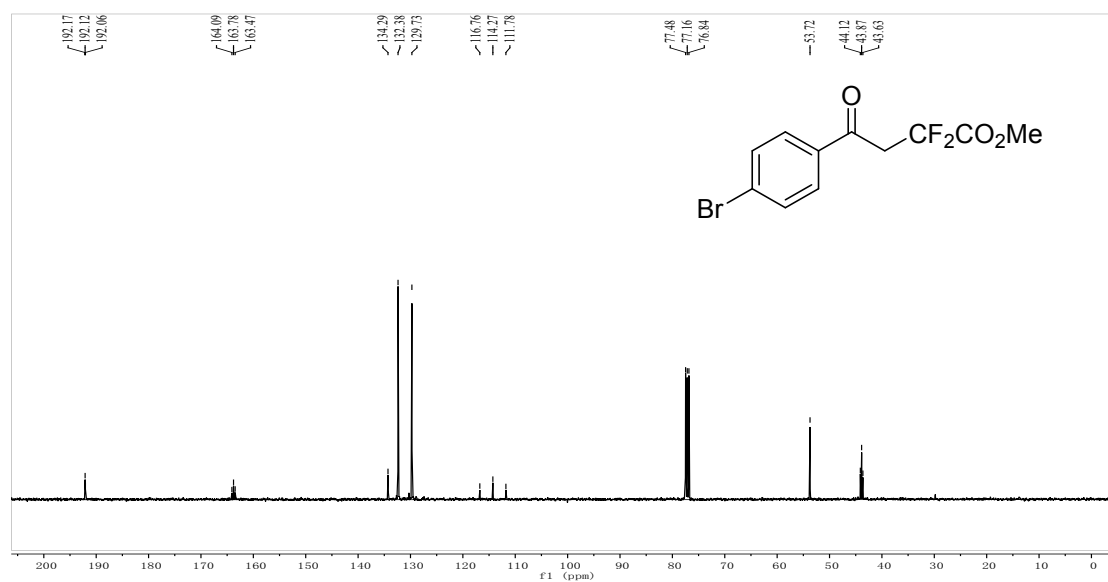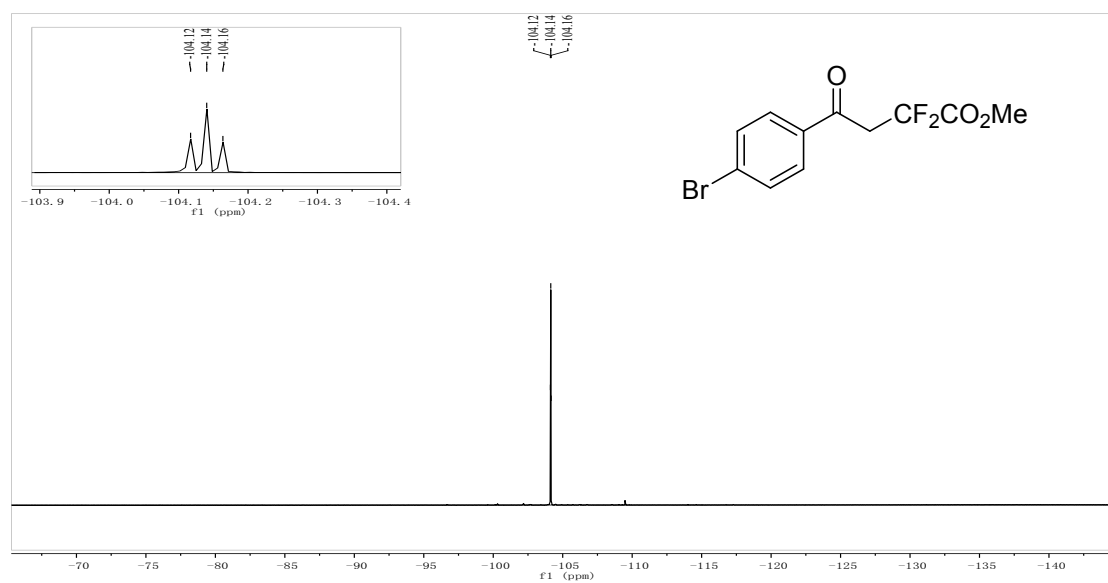

<sup>1</sup>H NMR, <sup>13</sup>C{<sup>1</sup>H} NMR, and <sup>19</sup>F NMR of **3g**

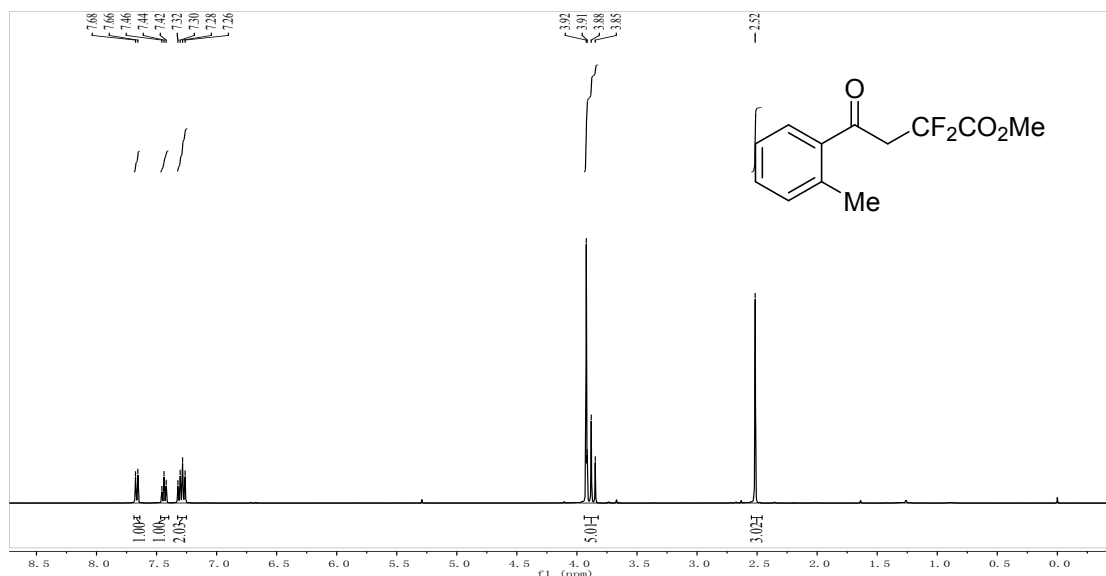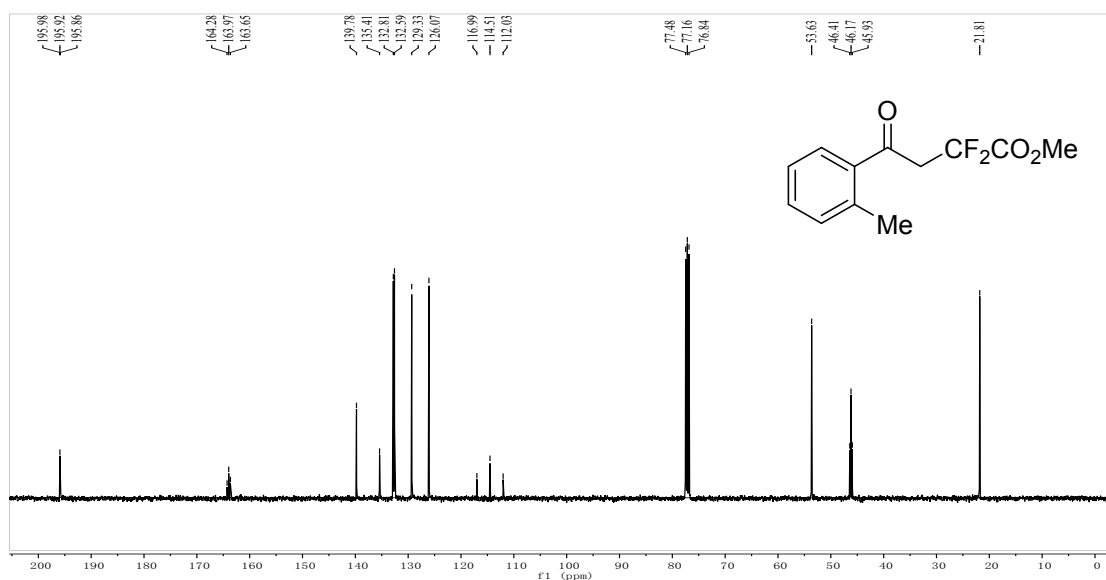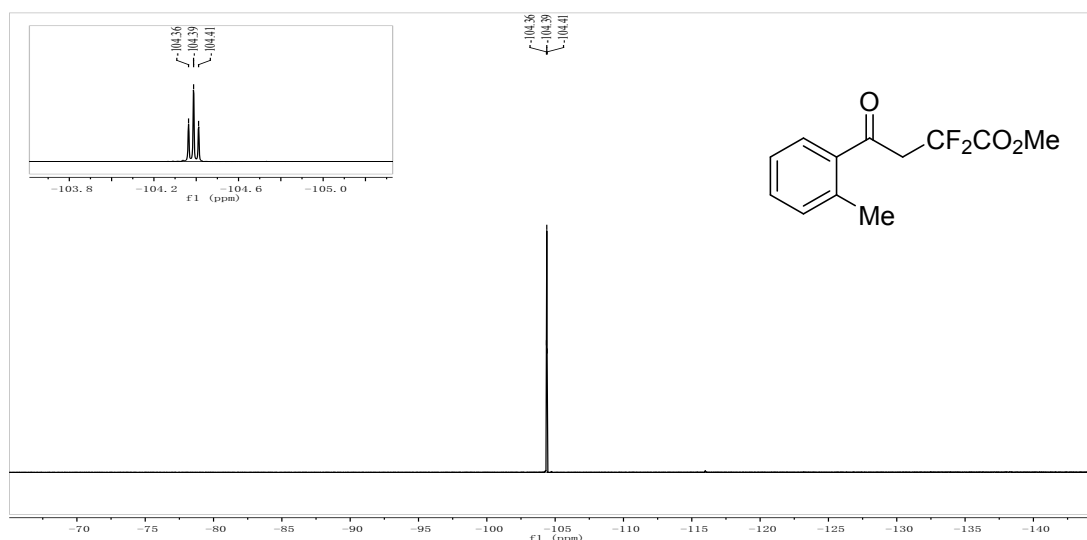

<sup>1</sup>H NMR, <sup>13</sup>C{<sup>1</sup>H} NMR, and <sup>19</sup>F NMR of **3h**

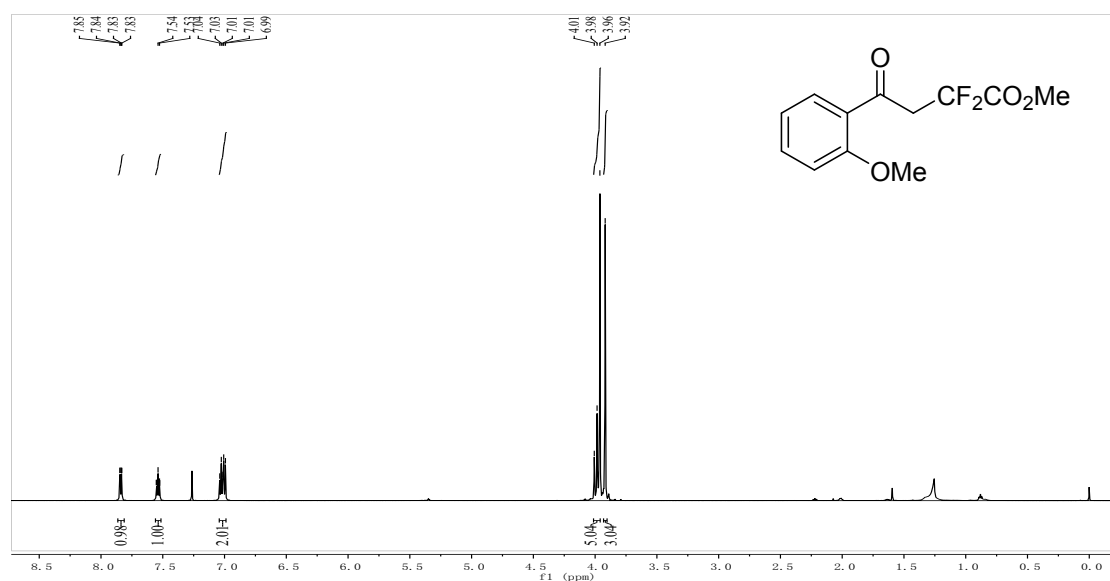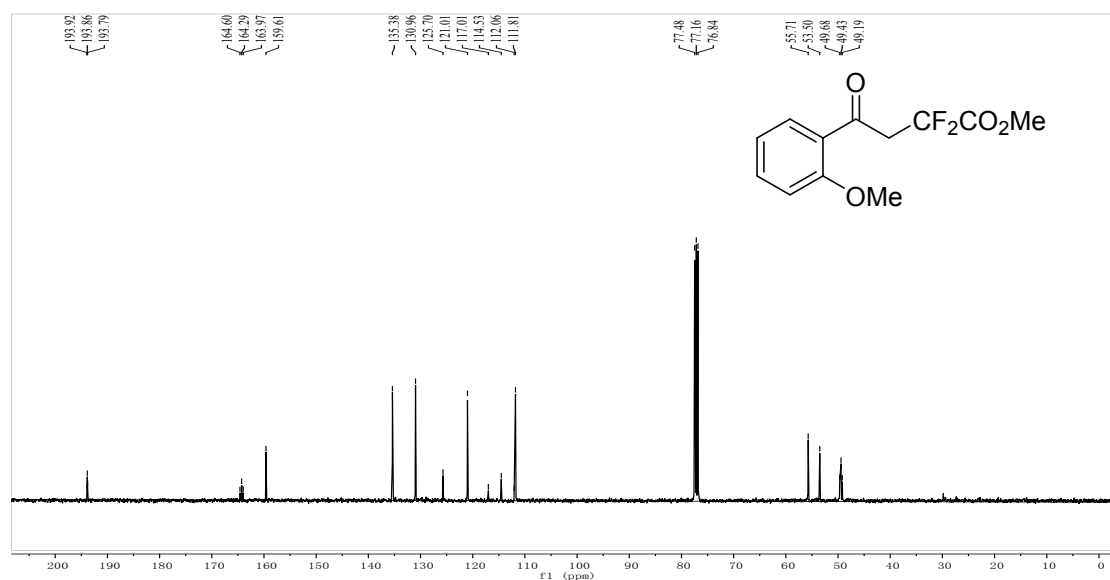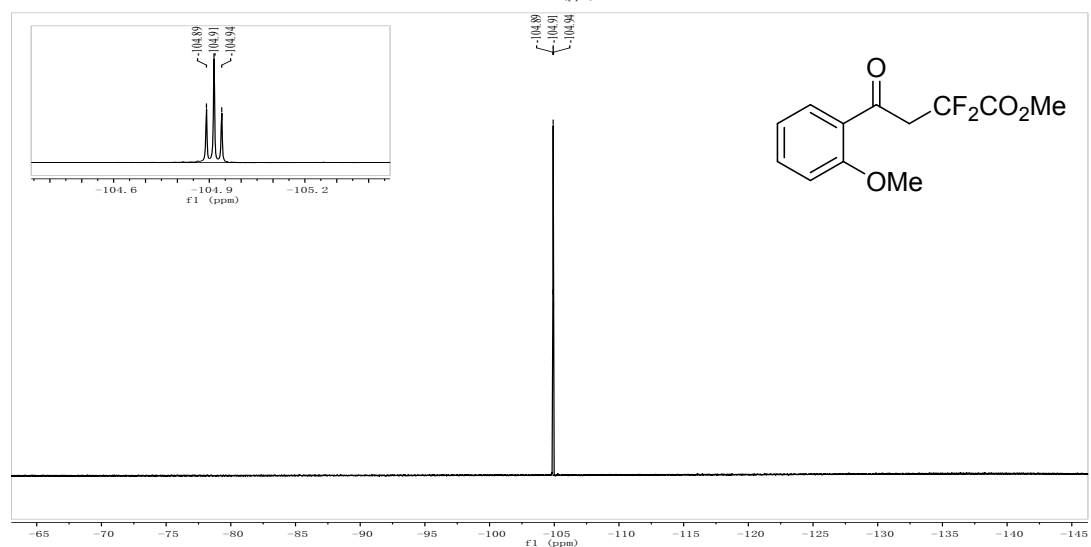

<sup>1</sup>H NMR, <sup>13</sup>C{<sup>1</sup>H} NMR, and <sup>19</sup>F NMR of **3i**

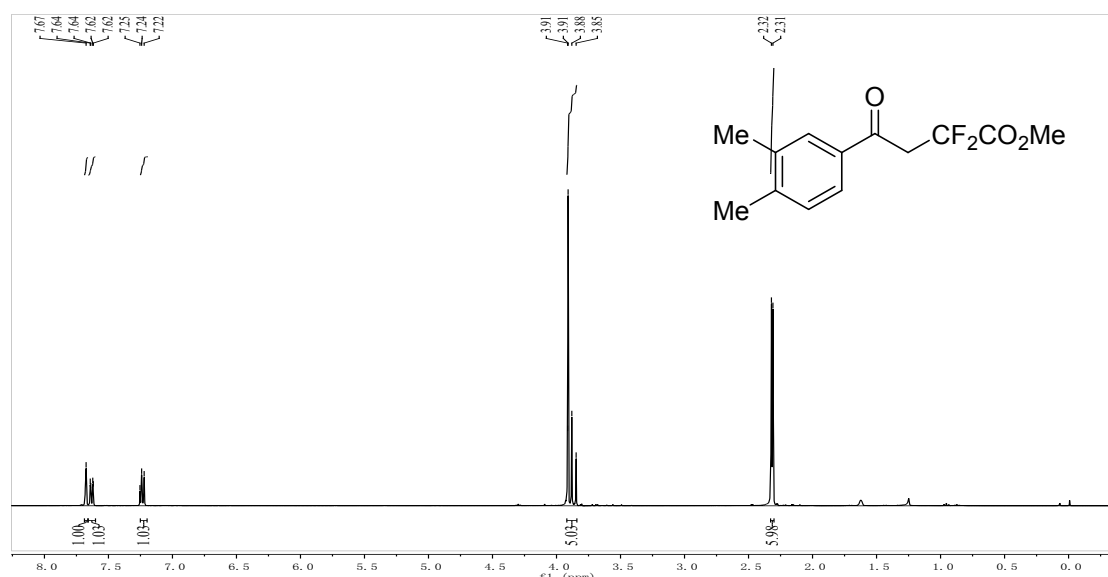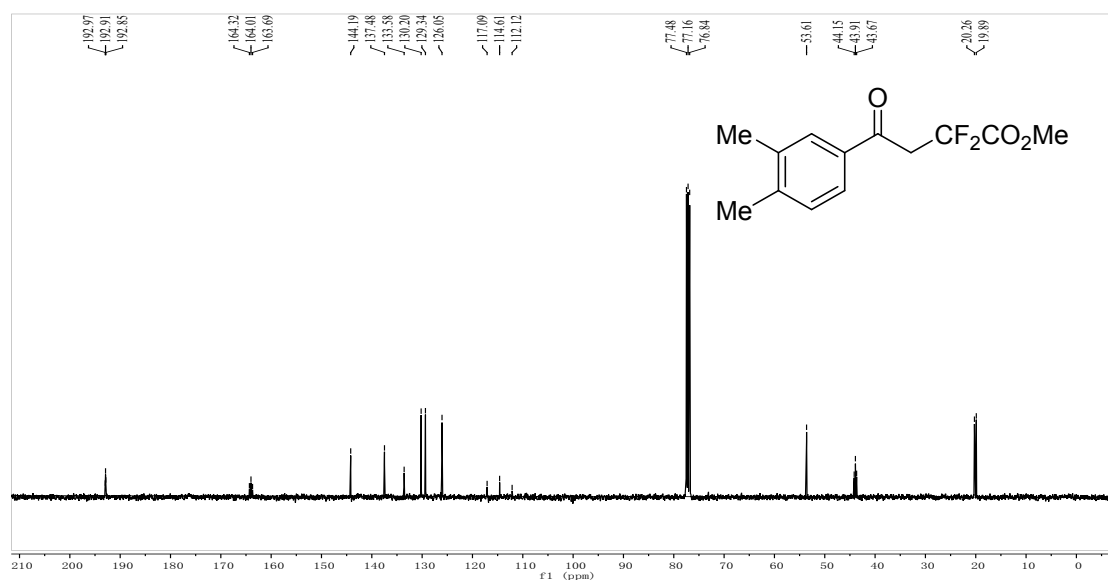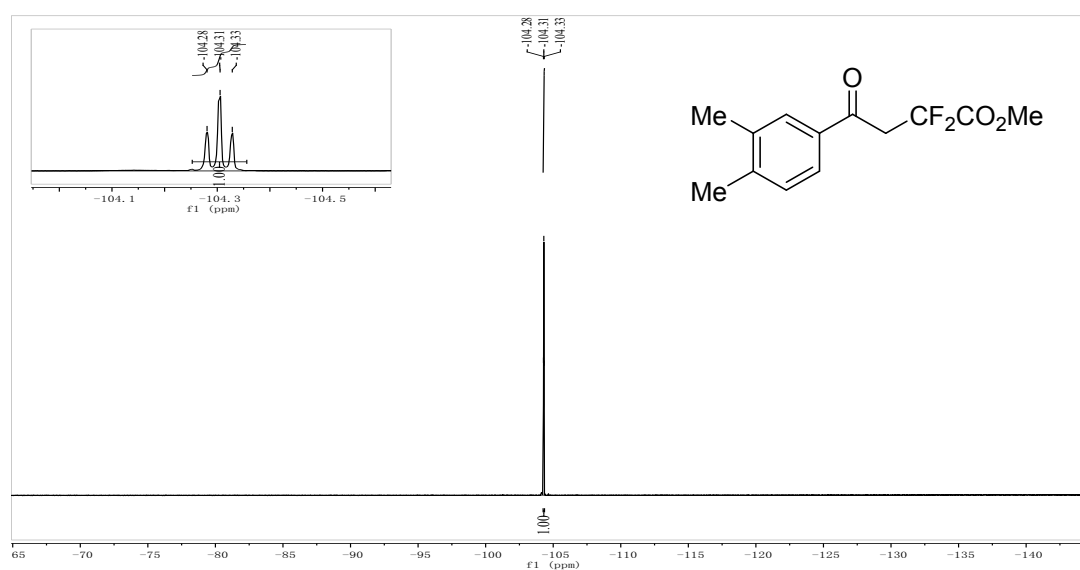

$^1\text{H}$  NMR,  $^{13}\text{C}\{^1\text{H}\}$  NMR, and  $^{19}\text{F}$  NMR of **3j**



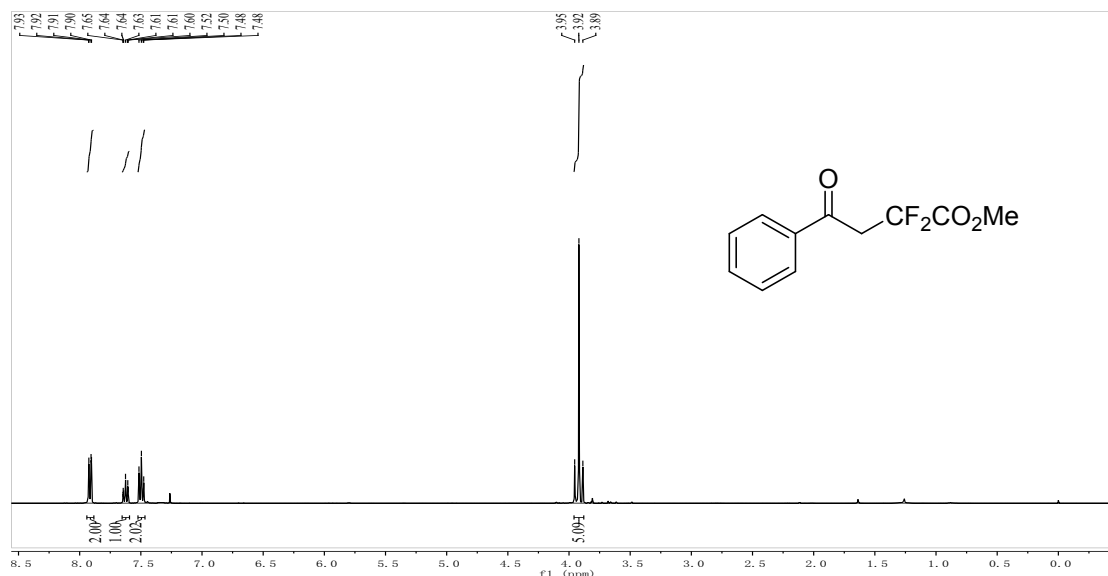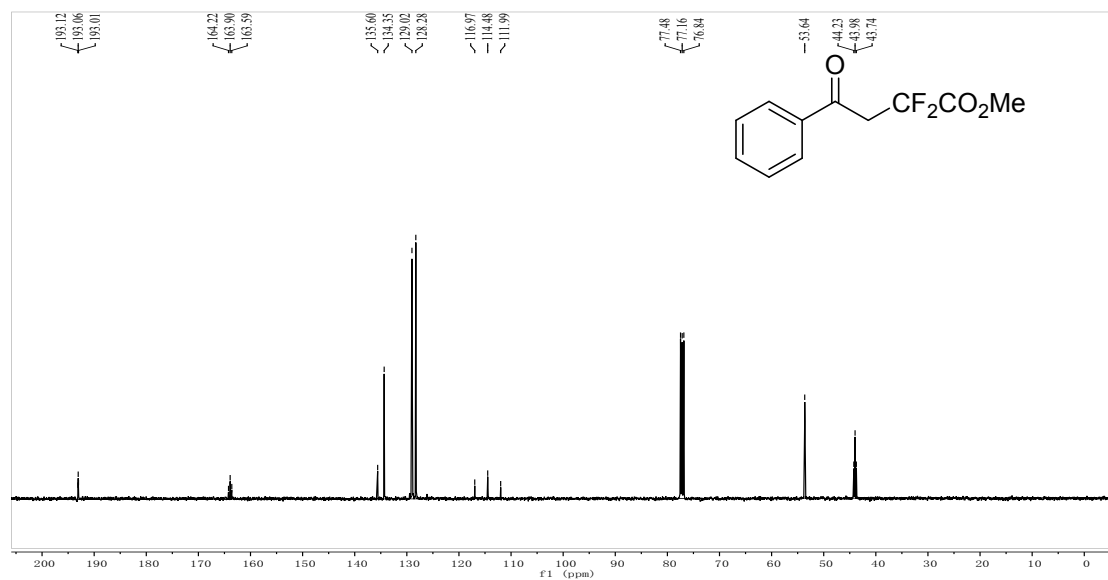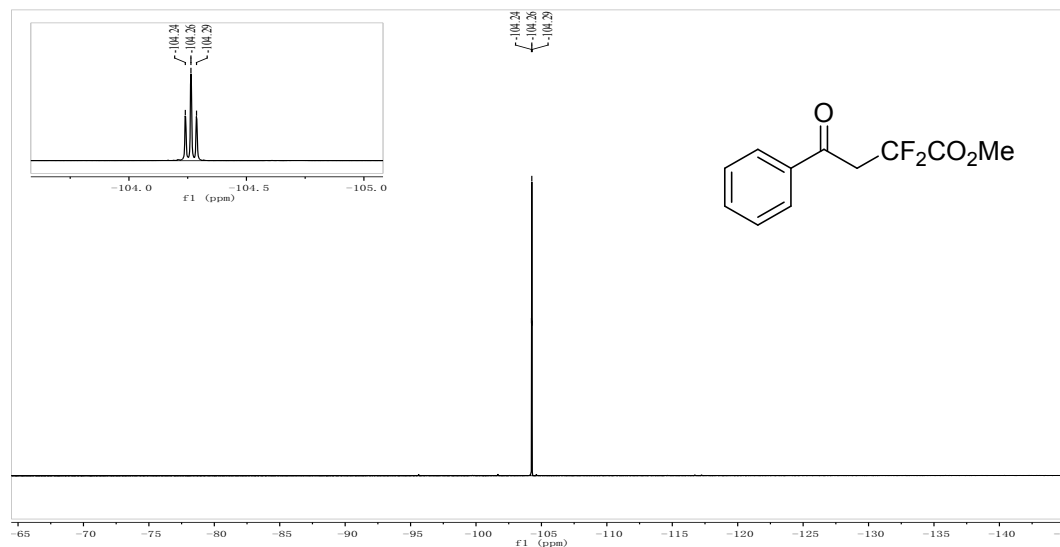

<sup>1</sup>H NMR, <sup>13</sup>C{<sup>1</sup>H} NMR, and <sup>19</sup>F NMR of **3k**



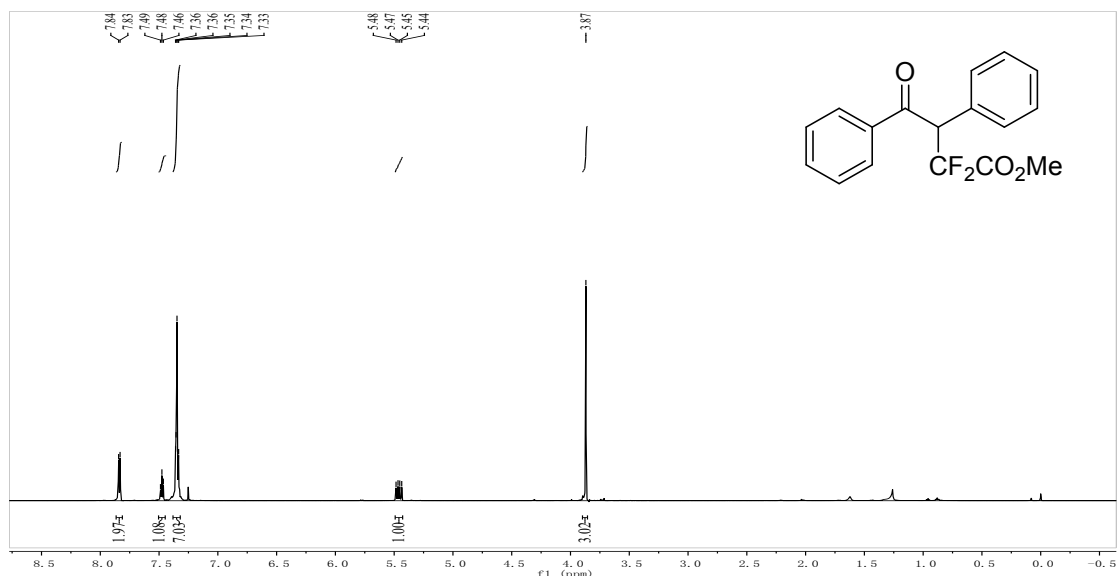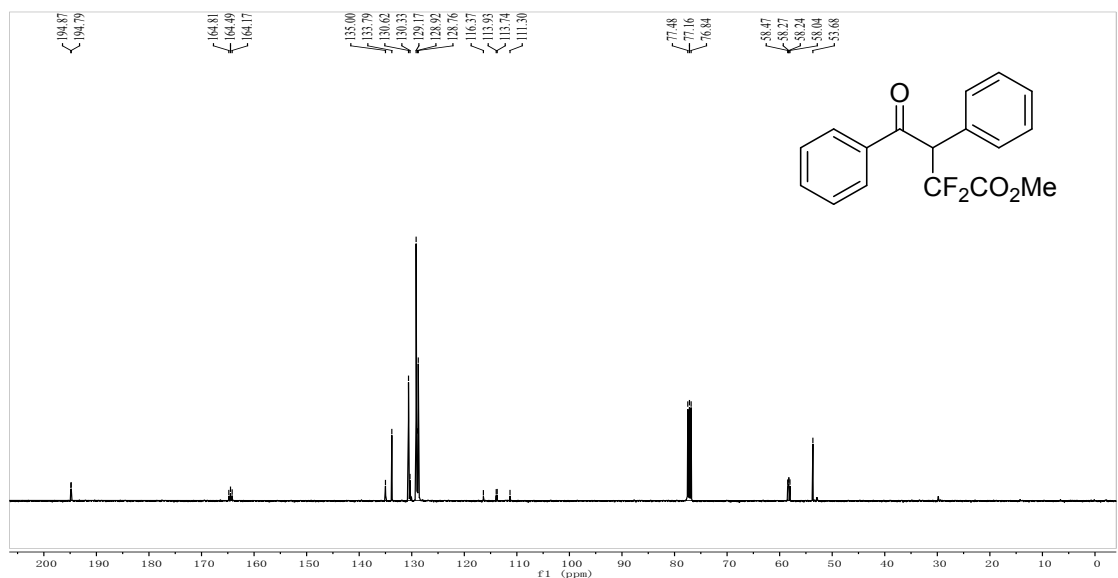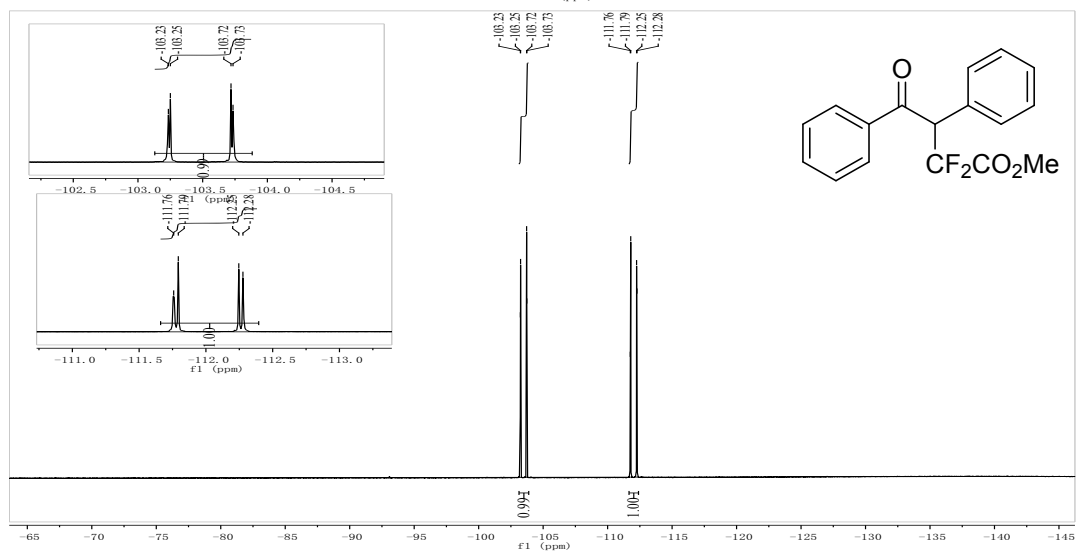

<sup>1</sup>H NMR, <sup>13</sup>C{<sup>1</sup>H} NMR, and <sup>19</sup>F NMR of **3m**

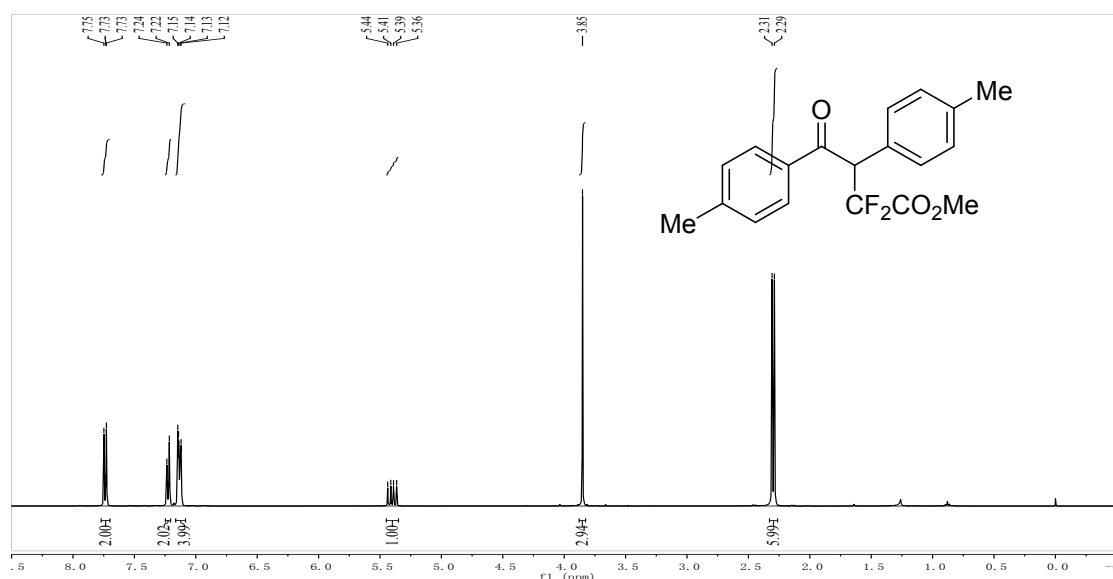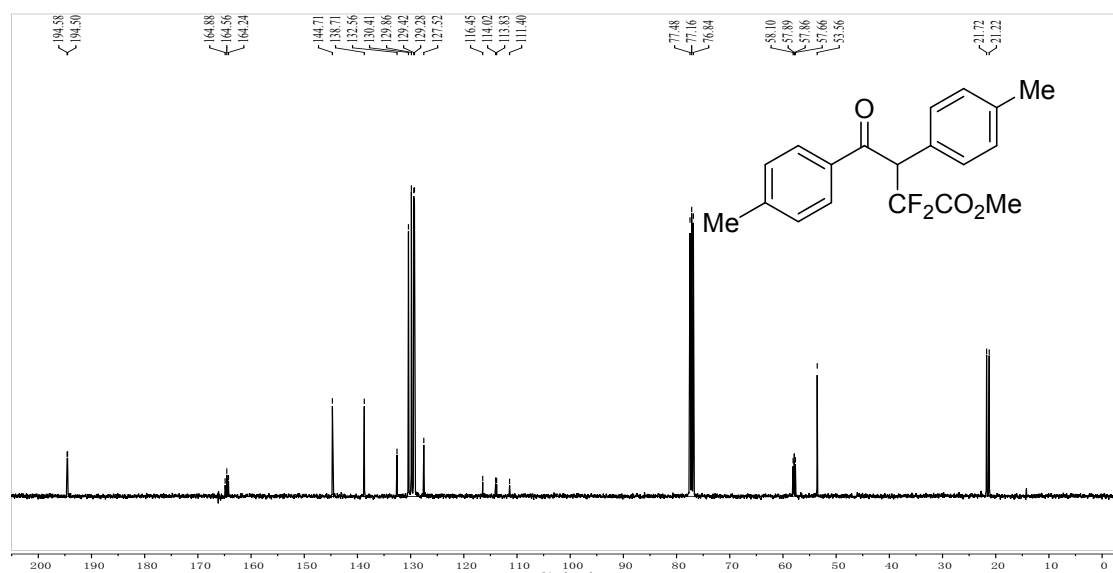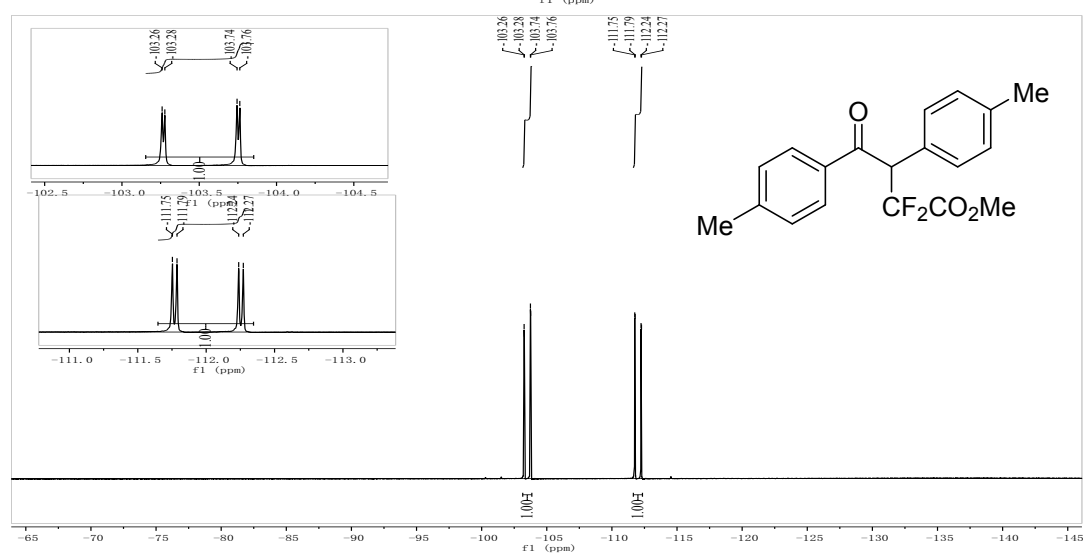

**<sup>1</sup>H NMR, <sup>13</sup>C{<sup>1</sup>H} NMR, and <sup>19</sup>F NMR of 3n**

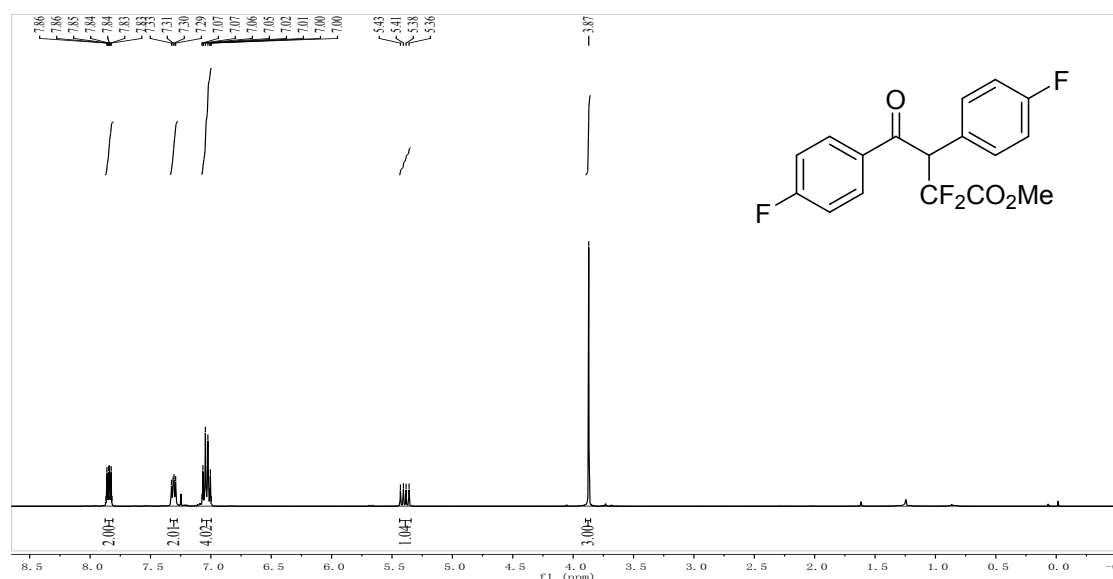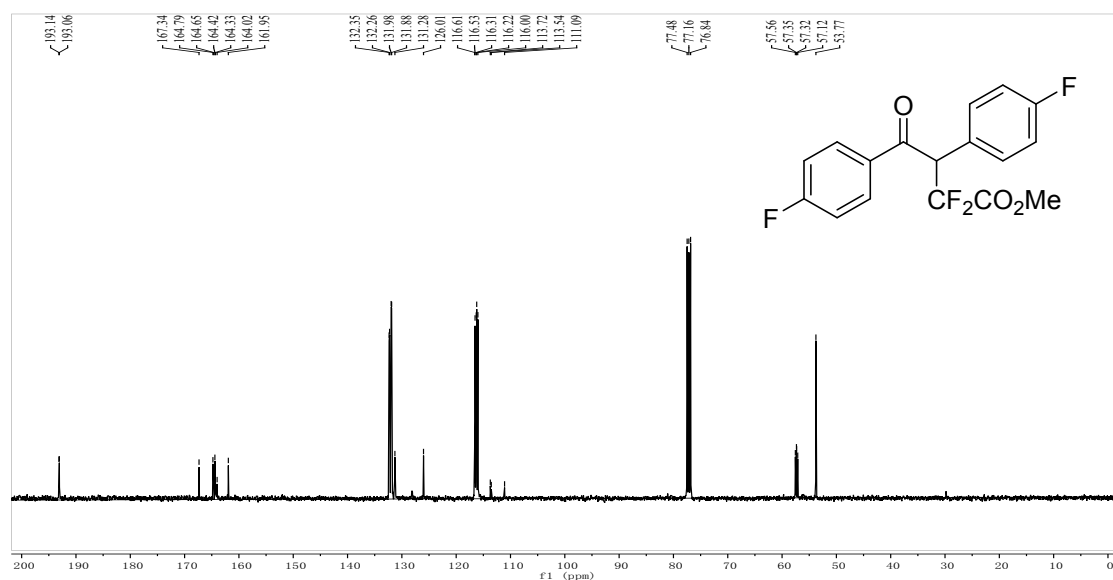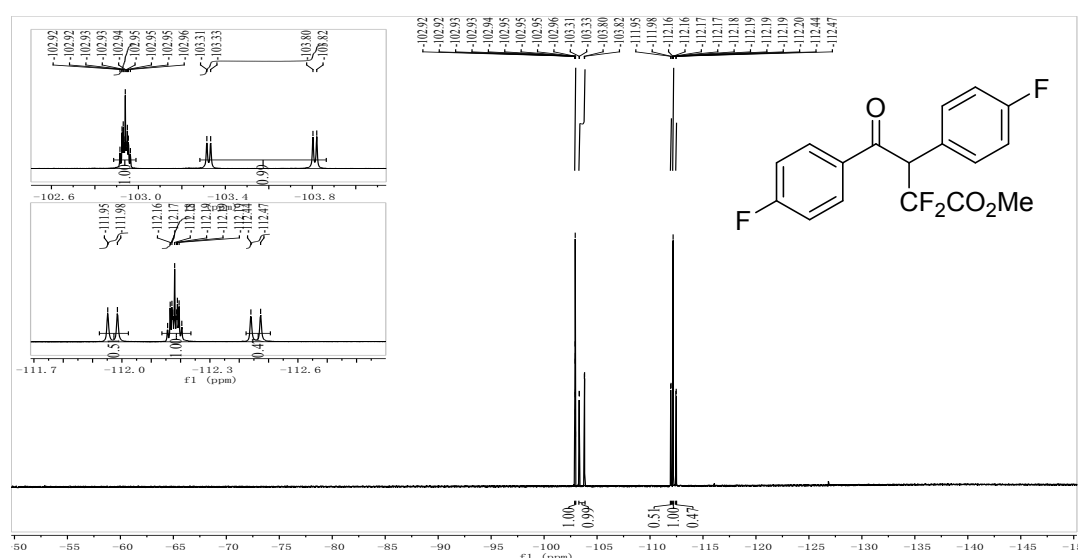

**<sup>1</sup>H NMR, <sup>13</sup>C {<sup>1</sup>H} NMR, and <sup>19</sup>F NMR of 30**

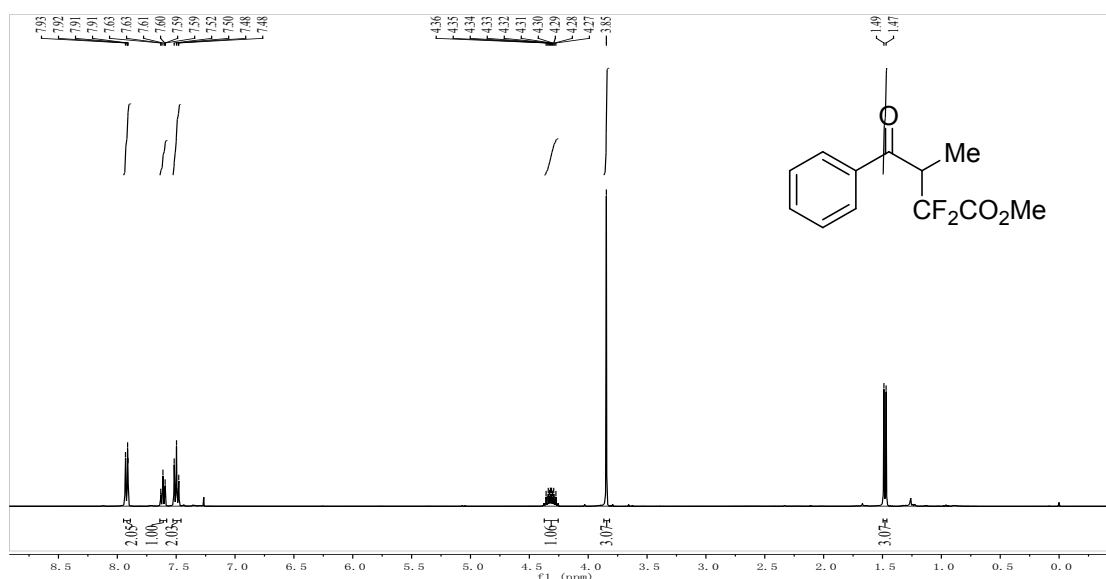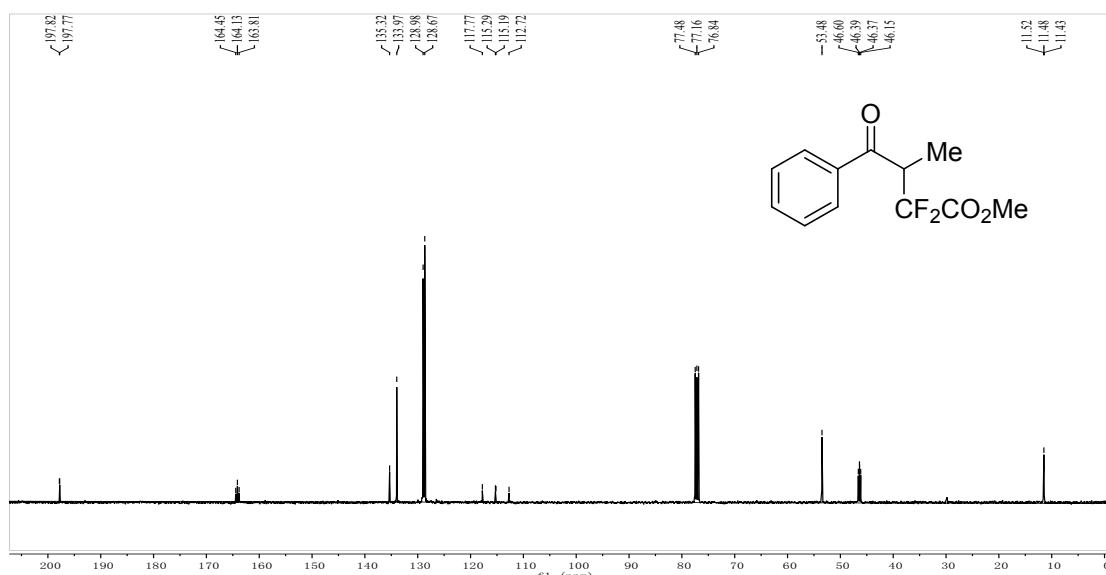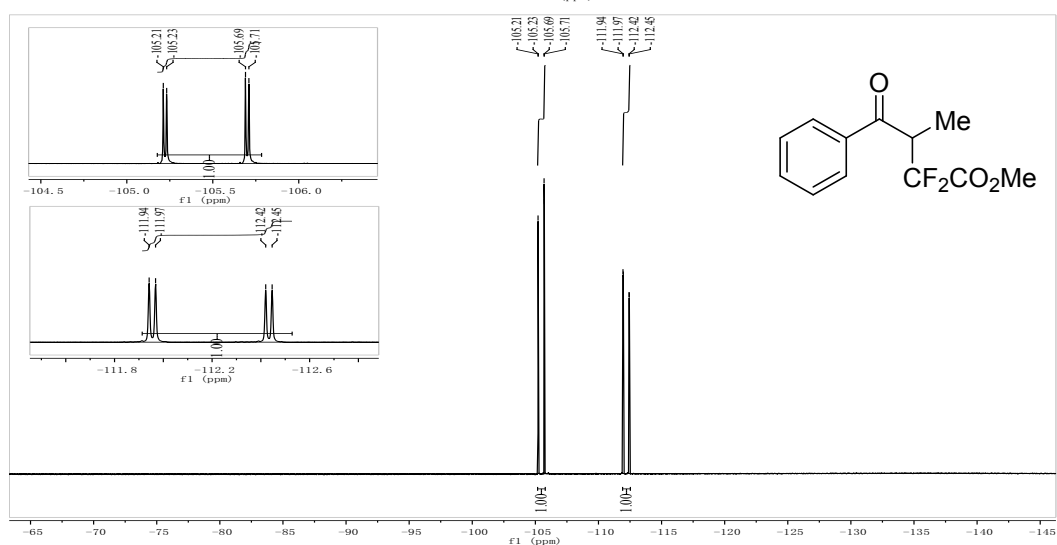

<sup>1</sup>H NMR, <sup>13</sup>C{<sup>1</sup>H} NMR, and <sup>19</sup>F NMR of 3p

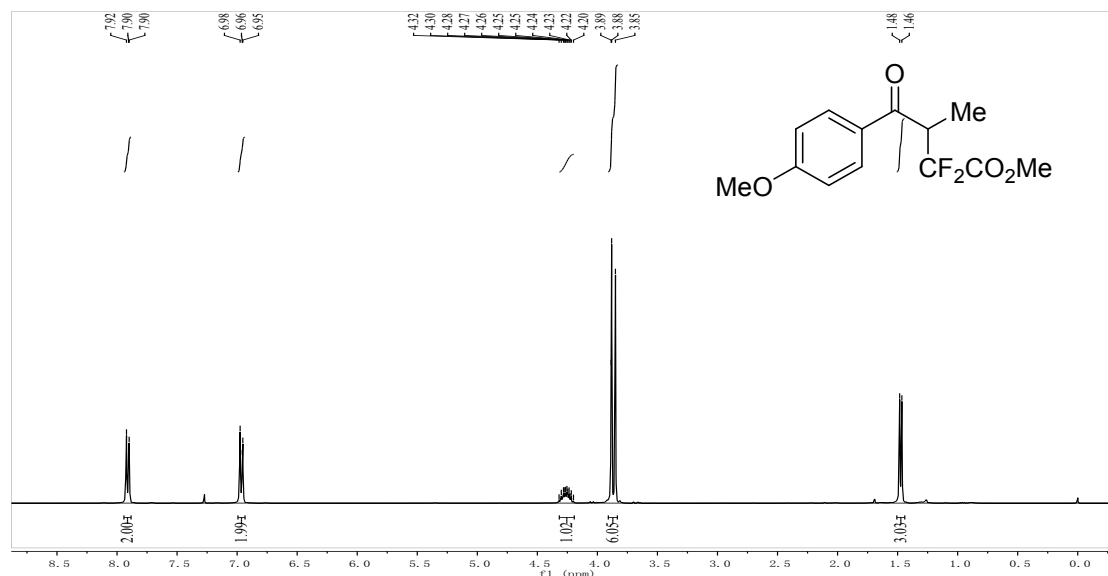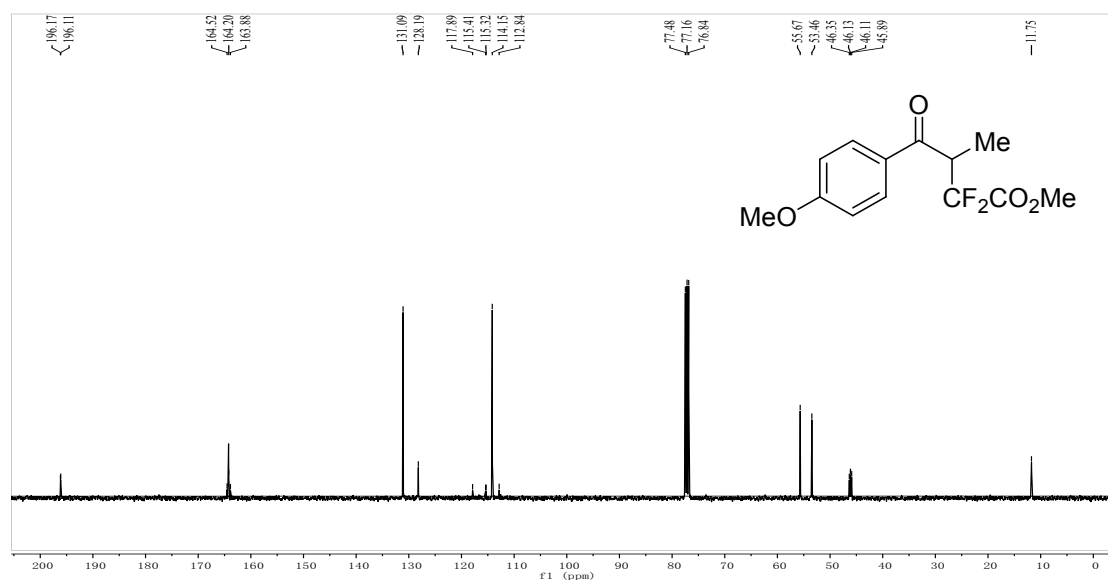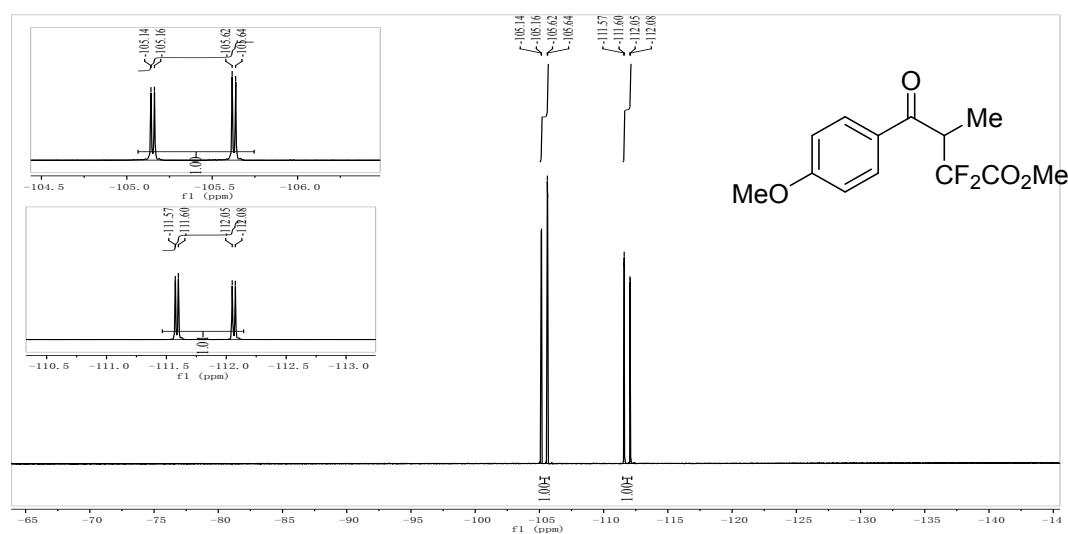

<sup>1</sup>H NMR, <sup>13</sup>C{<sup>1</sup>H} NMR, and <sup>19</sup>F NMR of **3q**





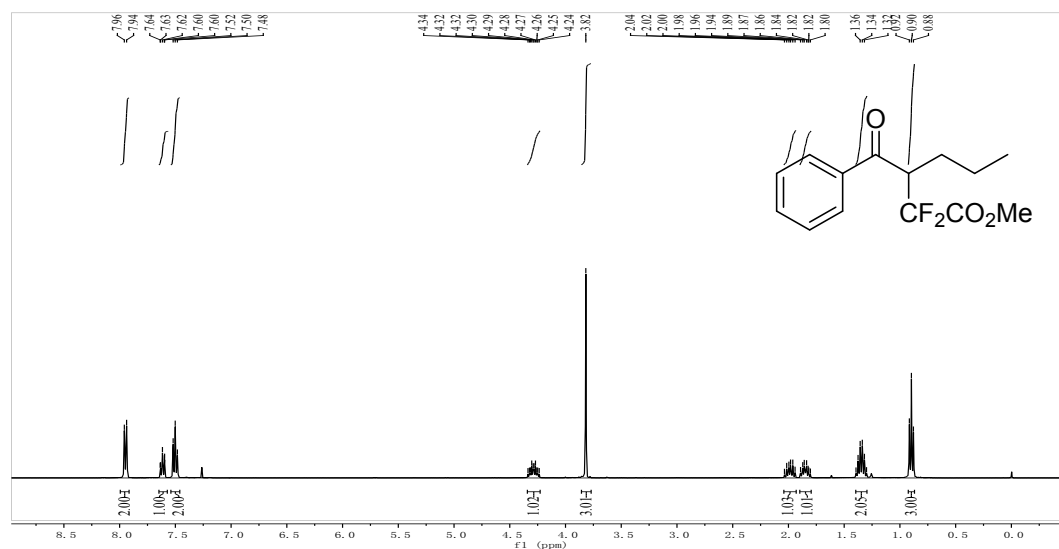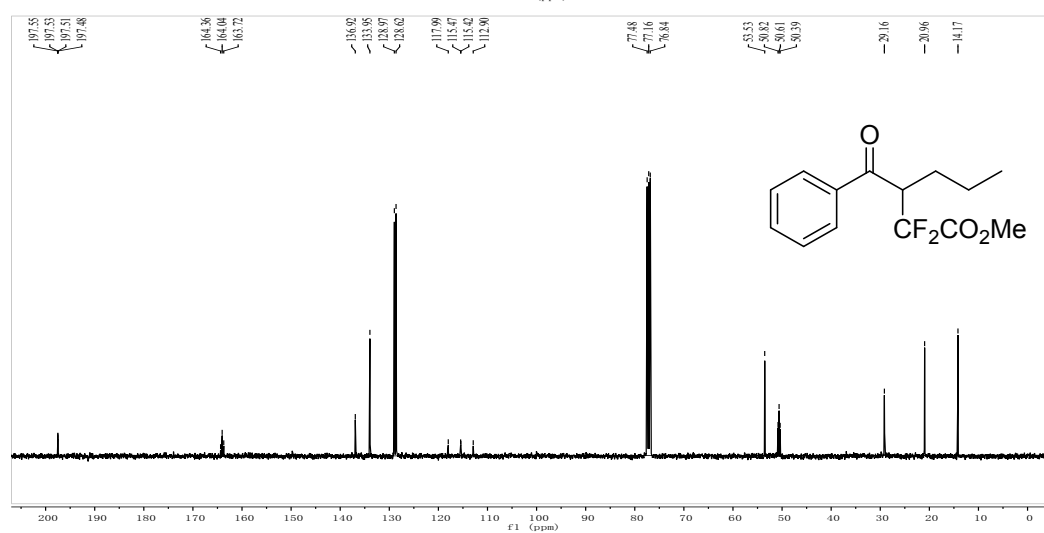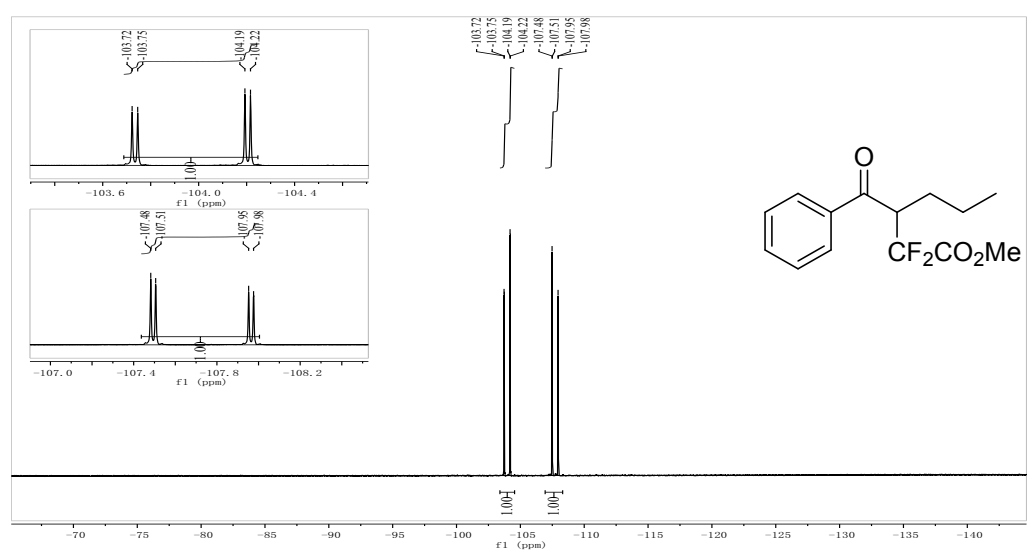

<sup>1</sup>H NMR, <sup>13</sup>C {<sup>1</sup>H} NMR, and <sup>19</sup>F NMR of 3s

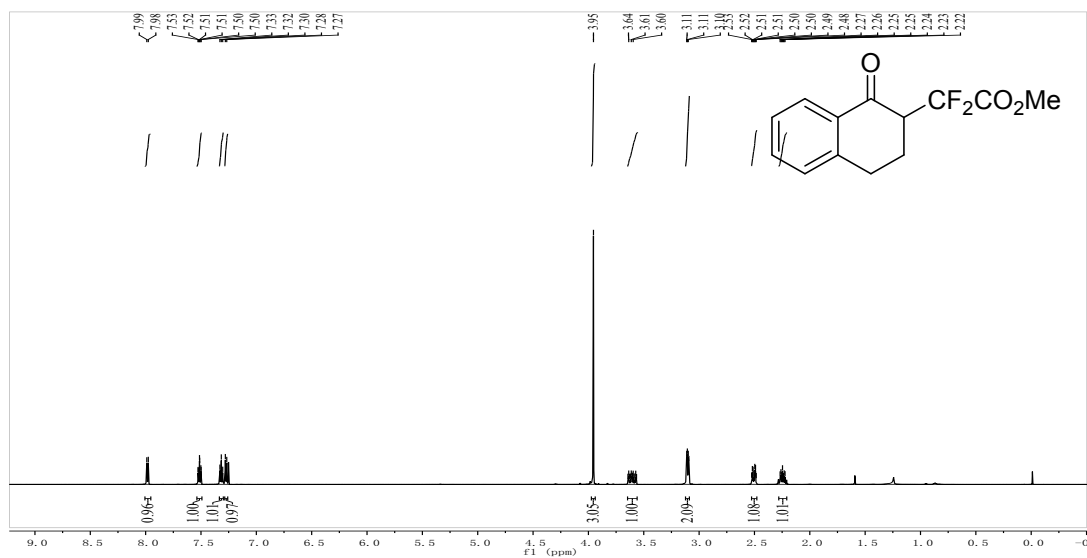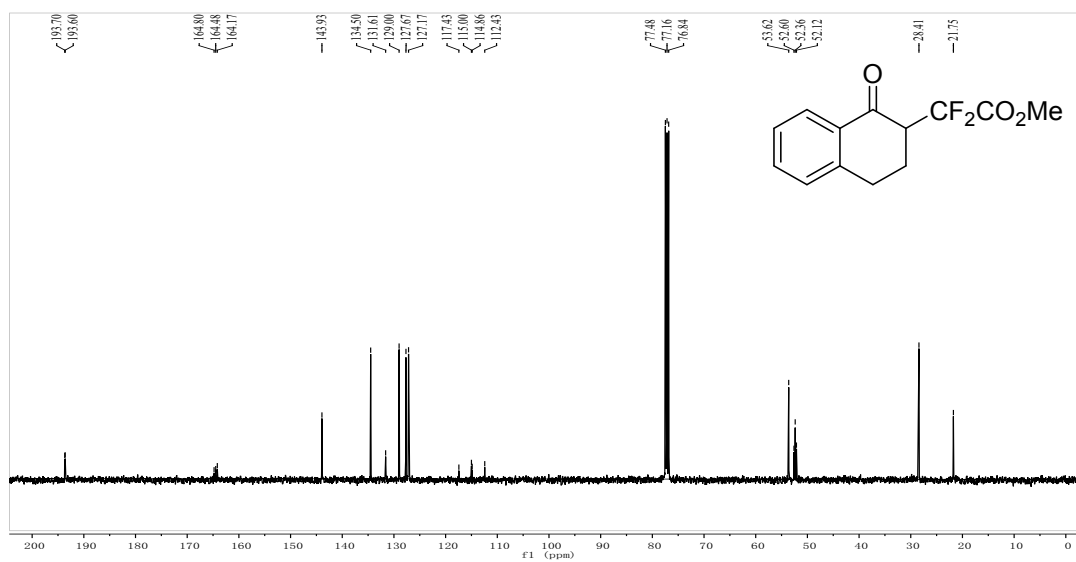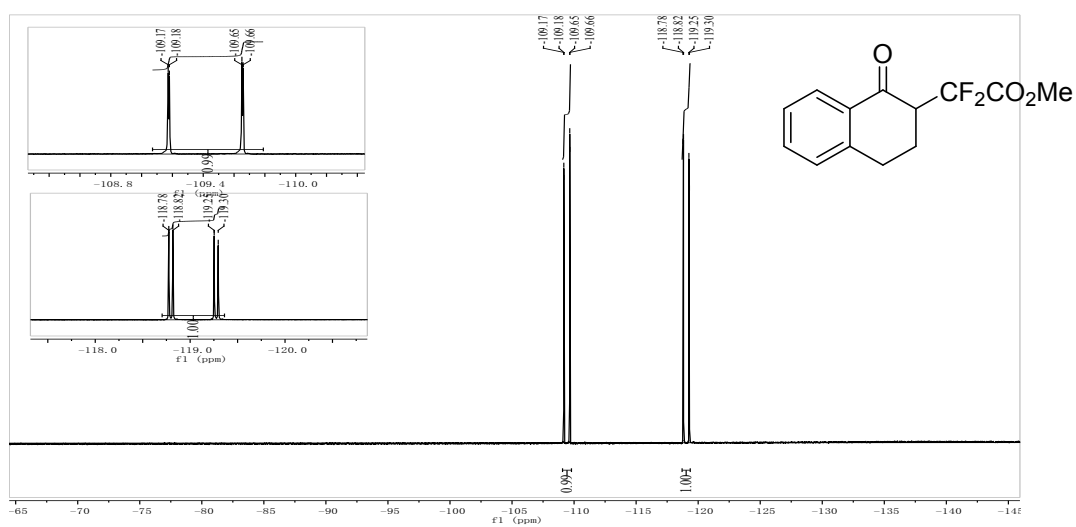

**<sup>1</sup>H NMR, <sup>13</sup>C{<sup>1</sup>H} NMR, and <sup>19</sup>F NMR of 3t**

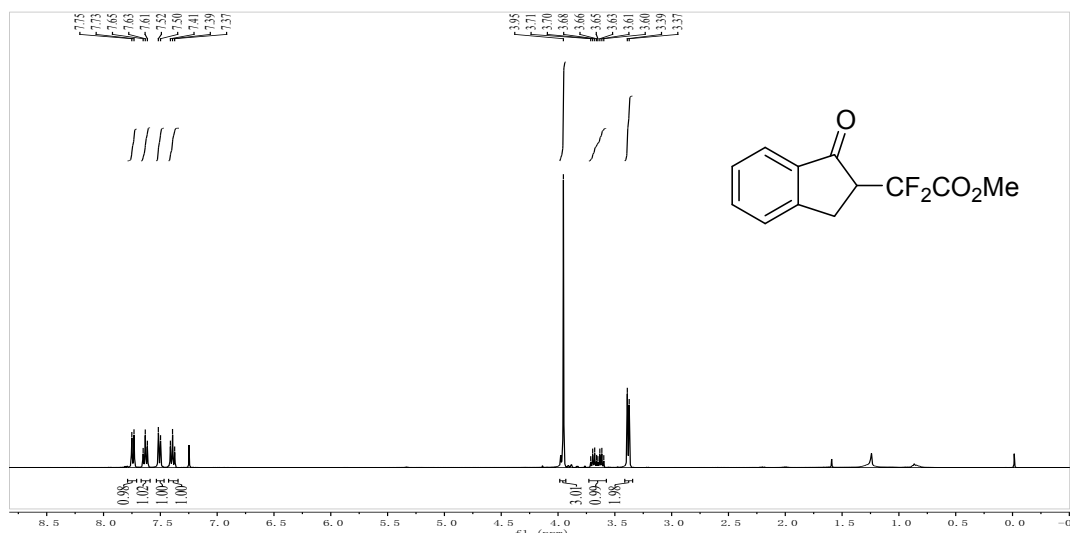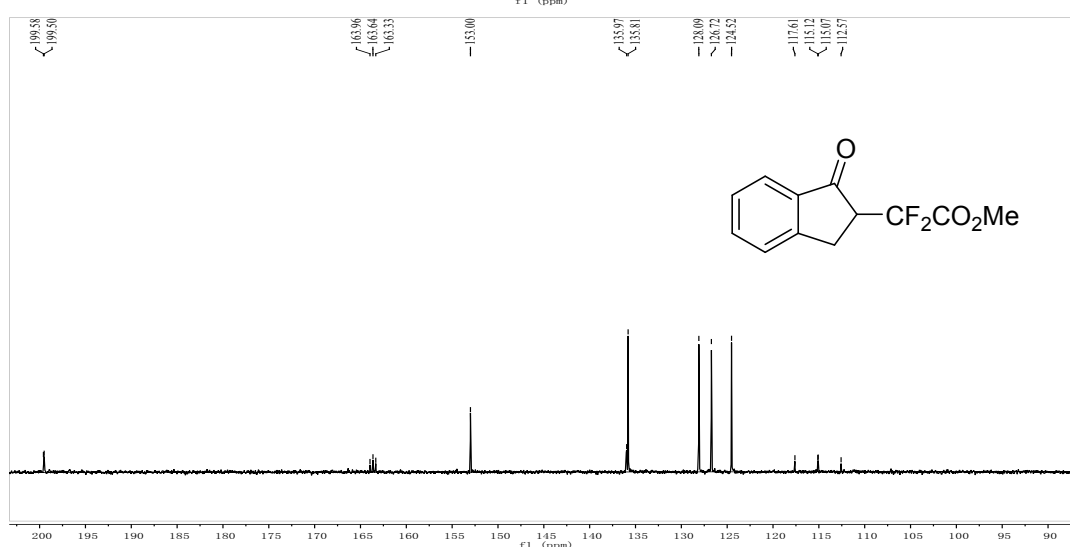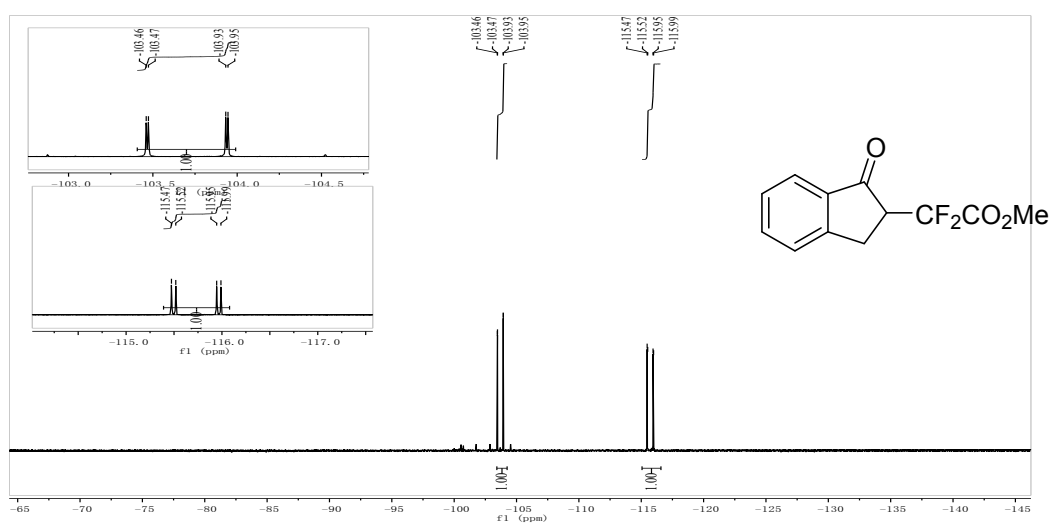

<sup>1</sup>H NMR, <sup>13</sup>C{<sup>1</sup>H} NMR, and <sup>19</sup>F NMR of **3u**
